# Supplementary material for: CD8+ T cell-intrinsic IL-6 signaling promotes resistance to anti-PD-L1 immunotherapy
Source: PubMed Central journal article supplement (PMC9873827; doi:10.1016/j.xcrm.2022.100878), 2023-01-03
Supplement: mmc4.pdf [file mmc4.pdf]

# CD8<sup>+</sup> T cell-intrinsic IL-6 signaling promotes resistance to anti-PD-L1 immunotherapy

## Graphical abstract

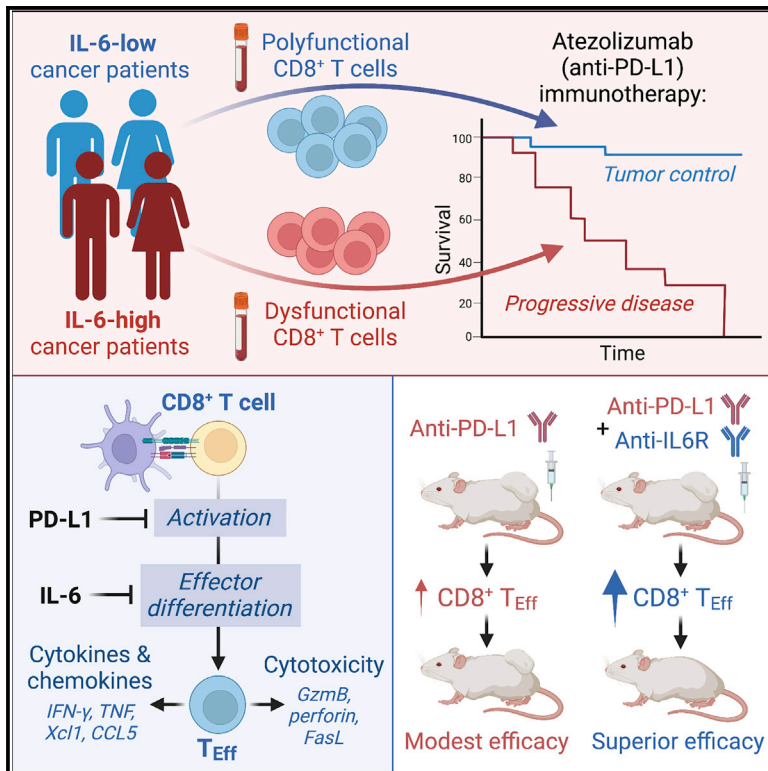

## Authors

Mahrukh A. Huseni, Lifeng Wang, Joanna E. Klementowicz, ..., Luciana Molinero, Mark Merchant, Nathaniel R. West

## Correspondence

huseni.mahrukh@gene.com (M.A.H.), west.nathaniel@gene.com (N.R.W.)

## In brief

Identifying clinically actionable drivers of therapeutic resistance is a major objective for cancer immunotherapy. Here, Huseni et al. identify IL-6 as a correlate of poor clinical response to atezolizumab (anti-PD-L1) therapy and demonstrate that IL-6 impairs anti-tumor functions of cytotoxic T cells.

## Highlights

- High IL-6 associates with poor atezolizumab efficacy in patients with advanced cancer
- IL6R- and PD-L1-blocking antibodies combine synergistically to treat murine tumors
- IL-6-STAT3 signaling blocks cytotoxic effector differentiation of CD8<sup>+</sup> T cells
- Cell-intrinsic IL-6 signaling in CD8<sup>+</sup> T cells limits pre-clinical anti-PD-L1 activity

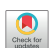

## Report

# CD8<sup>+</sup> T cell-intrinsic IL-6 signaling promotes resistance to anti-PD-L1 immunotherapy

Mahrukh A. Huseni,<sup>1,6,\*</sup> Lifen Wang,<sup>1,6</sup> Joanna E. Klementowicz,<sup>1,6</sup> Kobe Yuen,<sup>1,6</sup> Beatrice Breart,<sup>1</sup> Christine Orr,<sup>1</sup> Li-fen Liu,<sup>1</sup> Yijin Li,<sup>1</sup> Vinita Gupta,<sup>1</sup> Congfen Li,<sup>1</sup> Deepali Rishipathak,<sup>1</sup> Jing Peng,<sup>1</sup> Yasin Şenbabaoğlu,<sup>1</sup> Zora Modrusan,<sup>1</sup> Shilpa Keerthivasan,<sup>1</sup> Shravan Madireddi,<sup>1</sup> Ying-Jiun Chen,<sup>1</sup> Eleanor J. Fraser,<sup>1</sup> Ning Leng,<sup>1</sup> Habib Hamidi,<sup>1</sup> Hartmut Koeppen,<sup>1</sup> James Ziai,<sup>1</sup> Kenji Hashimoto,<sup>1</sup> Marcella Fassò,<sup>1</sup> Patrick Williams,<sup>1</sup> David F. McDermott,<sup>2</sup> Jonathan E. Rosenberg,<sup>3</sup> Thomas Powles,<sup>4</sup> Leisha A. Emens,<sup>5</sup> Priti S. Hegde,<sup>1</sup> Ira Mellman,<sup>1</sup> Shannon J. Turley,<sup>1</sup> Mark S. Wilson,<sup>1</sup> Sanjeev Mariathasan,<sup>1</sup> Luciana Molinero,<sup>1</sup> Mark Merchant,<sup>1</sup> and Nathaniel R. West<sup>1,7,\*</sup>

<sup>1</sup>Genentech, South San Francisco, CA 94080, USA

<sup>2</sup>Beth Israel Deaconess Medical Center, Boston, MA 02215, USA

<sup>3</sup>Genitourinary Oncology Service, Department of Medicine, Memorial Sloan Kettering Cancer Center, New York, NY 10065, USA

<sup>4</sup>Barts Experimental Cancer Medicine Centre, Barts Cancer Institute, Queen Mary University of London, London EC1M 6BQ, UK

<sup>5</sup>University of Pittsburgh Medical Center, Hillman Cancer Center, Pittsburgh, PA 15213, USA

<sup>6</sup>These authors contributed equally

<sup>7</sup>Lead contact

\*Correspondence: [huseni.mahrukh@gene.com](mailto:huseni.mahrukh@gene.com) (M.A.H.), [west.nathaniel@gene.com](mailto:west.nathaniel@gene.com) (N.R.W.)

<https://doi.org/10.1016/j.xcrm.2022.100878>

## SUMMARY

Although immune checkpoint inhibitors (ICIs) are established as effective cancer therapies, overcoming therapeutic resistance remains a critical challenge. Here we identify interleukin 6 (IL-6) as a correlate of poor response to atezolizumab (anti-PD-L1) in large clinical trials of advanced kidney, breast, and bladder cancers. In pre-clinical models, combined blockade of PD-L1 and the IL-6 receptor (IL6R) causes synergistic regression of large established tumors and substantially improves anti-tumor CD8<sup>+</sup> cytotoxic T lymphocyte (CTL) responses compared with anti-PD-L1 alone. Circulating CTLs from cancer patients with high plasma IL-6 display a repressed functional profile based on single-cell RNA sequencing, and IL-6-STAT3 signaling inhibits classical cytotoxic differentiation of CTLs *in vitro*. In tumor-bearing mice, CTL-specific IL6R deficiency is sufficient to improve anti-PD-L1 activity. Thus, based on both clinical and experimental evidence, agents targeting IL-6 signaling are plausible partners for combination with ICIs in cancer patients.

## INTRODUCTION

Immune checkpoint inhibitors (ICIs) are approved therapies for multiple forms of cancer, but they fail to elicit durable clinical responses in the majority of patients.<sup>1</sup> Identifying therapeutically actionable mechanisms of ICI resistance is therefore critical to maximize the benefit of cancer immunotherapy.

Despite the well-described roles of many cytokines in tumor development, they are not widely exploited as therapeutic targets in oncology. The pleiotropic cytokine interleukin 6 (IL-6) is associated with tumor progression and is thought to influence anti-tumor immunity through various mechanisms.<sup>2–4</sup> Interestingly, plasma IL-6 was associated prognostically with reduced survival of ICI-treated melanoma patients.<sup>5,6</sup> Recent pre-clinical studies have also implicated IL-6 as a potential driver of ICI resistance,<sup>5,7–10</sup> but the underlying mechanisms remain unclear.

In this study, we identified high IL-6 levels as a feature of atezolizumab (anti-PD-L1)-resistant disease in patients with advanced cancers. IL-6 restrained effector differentiation of CD8<sup>+</sup> T cells (also known as cytotoxic T lymphocytes, or CTLs), and high plasma IL-6 correlated with reduced effector gene expression in CTLs from cancer patients. In pre-clinical tu-

mor models, IL6R blockade or genetic ablation of CTL-intrinsic IL-6 signaling synergized with anti-PD-L1 therapy to enhance anti-tumor CTL responses, leading to improved tumor control.

## RESULTS

### IL-6 is associated with poor clinical activity of atezolizumab (anti-PD-L1)

To identify potential drivers of anti-PD-L1 resistance, we evaluated gene expression by RNA-seq in pre-treatment tumor biopsies from IMmotion150, a randomized phase II trial of previously untreated metastatic renal cell carcinoma (RCC) comparing atezolizumab with or without bevacizumab versus the tyrosine kinase inhibitor sunitinib.<sup>11</sup> Clinical cohorts evaluated in this study are described in [Figure S1A](#) and [Tables S1–S3](#). Among patients treated with atezolizumab monotherapy, differential expression analysis comparing those who developed progressive disease (PD) versus those with evidence of disease control revealed various inflammatory factors associated with PD, including the cytokine *IL6* ([Figure 1A](#)). Among other cytokines and chemokines associated with PD, only *CXCL5* and *CXCL8* were more highly ranked than *IL6* ([Figure 1B](#)). Ingenuity

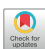

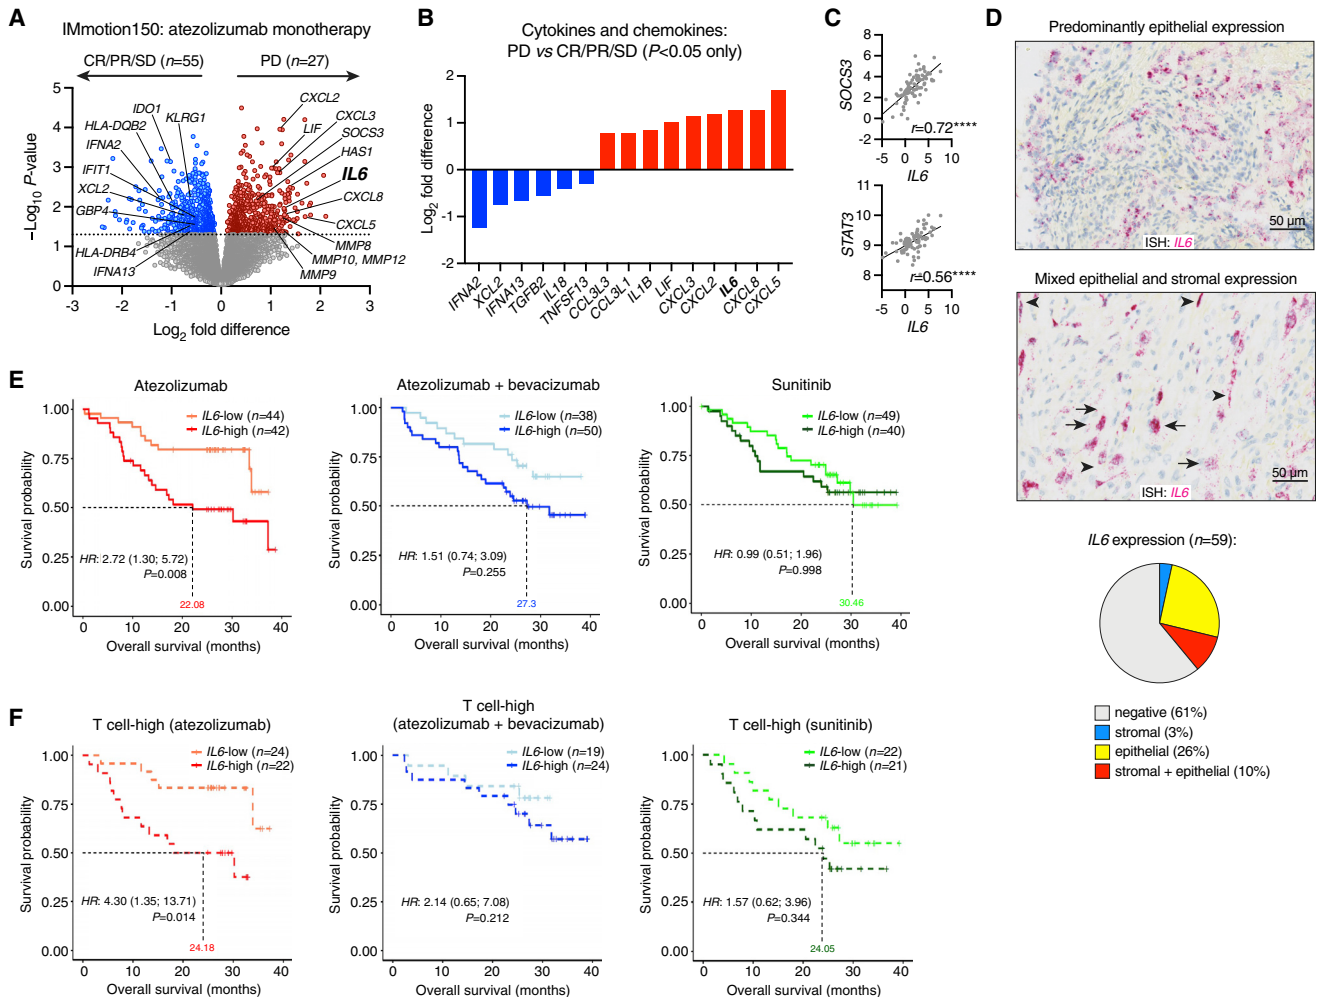

**Figure 1. IL6 expression associates with poor clinical outcome in atezolizumab-treated patients with metastatic RCC**

(A–C) RNA-seq analysis of pre-treatment tumor samples from the atezolizumab monotherapy arm of IMmotion150. (A) Differential gene expression analysis (Limma-voom), comparing PD (progressive disease) versus SD (stable disease), PR (partial response), or CR (complete response). Nominal p values are shown. (B) Differentially expressed cytokine and chemokine genes. (C) Pearson correlation of *IL6* with *SOCS3* and *STAT3*. \*\*\*\*p < 0.0001.

(D) IISH analysis of *IL6* mRNA in RCC tumors from IMmotion150 (n = 59). Black arrows, epithelial cell expression; arrowheads, stromal cell expression. Scale bar, 50 μm. Pie chart: proportions of tumors with *IL6* expression (staining in ≥ 1% of cells) in epithelial cells only (yellow), stromal cells only (blue), or both epithelial and stromal cells (red).

(E) Association of tumor *IL6* mRNA with overall survival (OS) in IMmotion150.

(F) Association of tumor *IL6* mRNA with OS in patients with high intratumoral T cell signature expression (>median). In (E) and (F), HR (+/– 95% CI) and p values were adjusted after multivariate analysis including the following co-variables: MSKCC (Memorial Sloan Kettering Cancer Center) prognostic risk score, previous nephrectomy, and liver metastasis.

Pathway Analysis identified IL-6 as a putative upstream regulator of PD-associated genes (p = 3.16e–9), in addition to the IL-6 receptor (IL6R; p = 1.04e–11) and the IL-6-induced transcription factor STAT3 (signal transducer and activator of transcription 3; p = 1.45e–9). *IL6* correlated strongly with *STAT3* and the *STAT3*-response gene *SOCS3*, consistent with active IL-6 signaling (Figure 1C). Tumor *IL6* mRNA (evaluated in n = 59 evaluable cases of RCC using *in situ* hybridization [ISH]) was observed mainly in epithelial and stromal cells (Figure 1D).

To confirm the association of IL-6 with poor atezolizumab efficacy, we next evaluated long-term patient survival. After multi-

variate correction, high tumor *IL6* (>median) was associated significantly with poor overall survival (OS) only in patients who received atezolizumab monotherapy (hazard ratio [HR]: 2.72, 95% confidence interval [CI]: 1.30, 5.72, p = 0.008; Figure 1E), including those with high expression of a CD8<sup>+</sup> T cell signature (HR: 4.30, 95% CI: 1.35, 13.71, p = 0.014; Figure 1F).<sup>11,12</sup>

IL-6 protein was significantly higher in pre-treatment plasma samples from RCC (IMmotion150) patients compared with healthy controls (Figure S1B) and correlated significantly with tumor *IL6* mRNA (r = 0.32, p < 0.0001; Figure S1C). High plasma IL-6 (>10 pg/mL; Figures S1D and S1E) was associated with

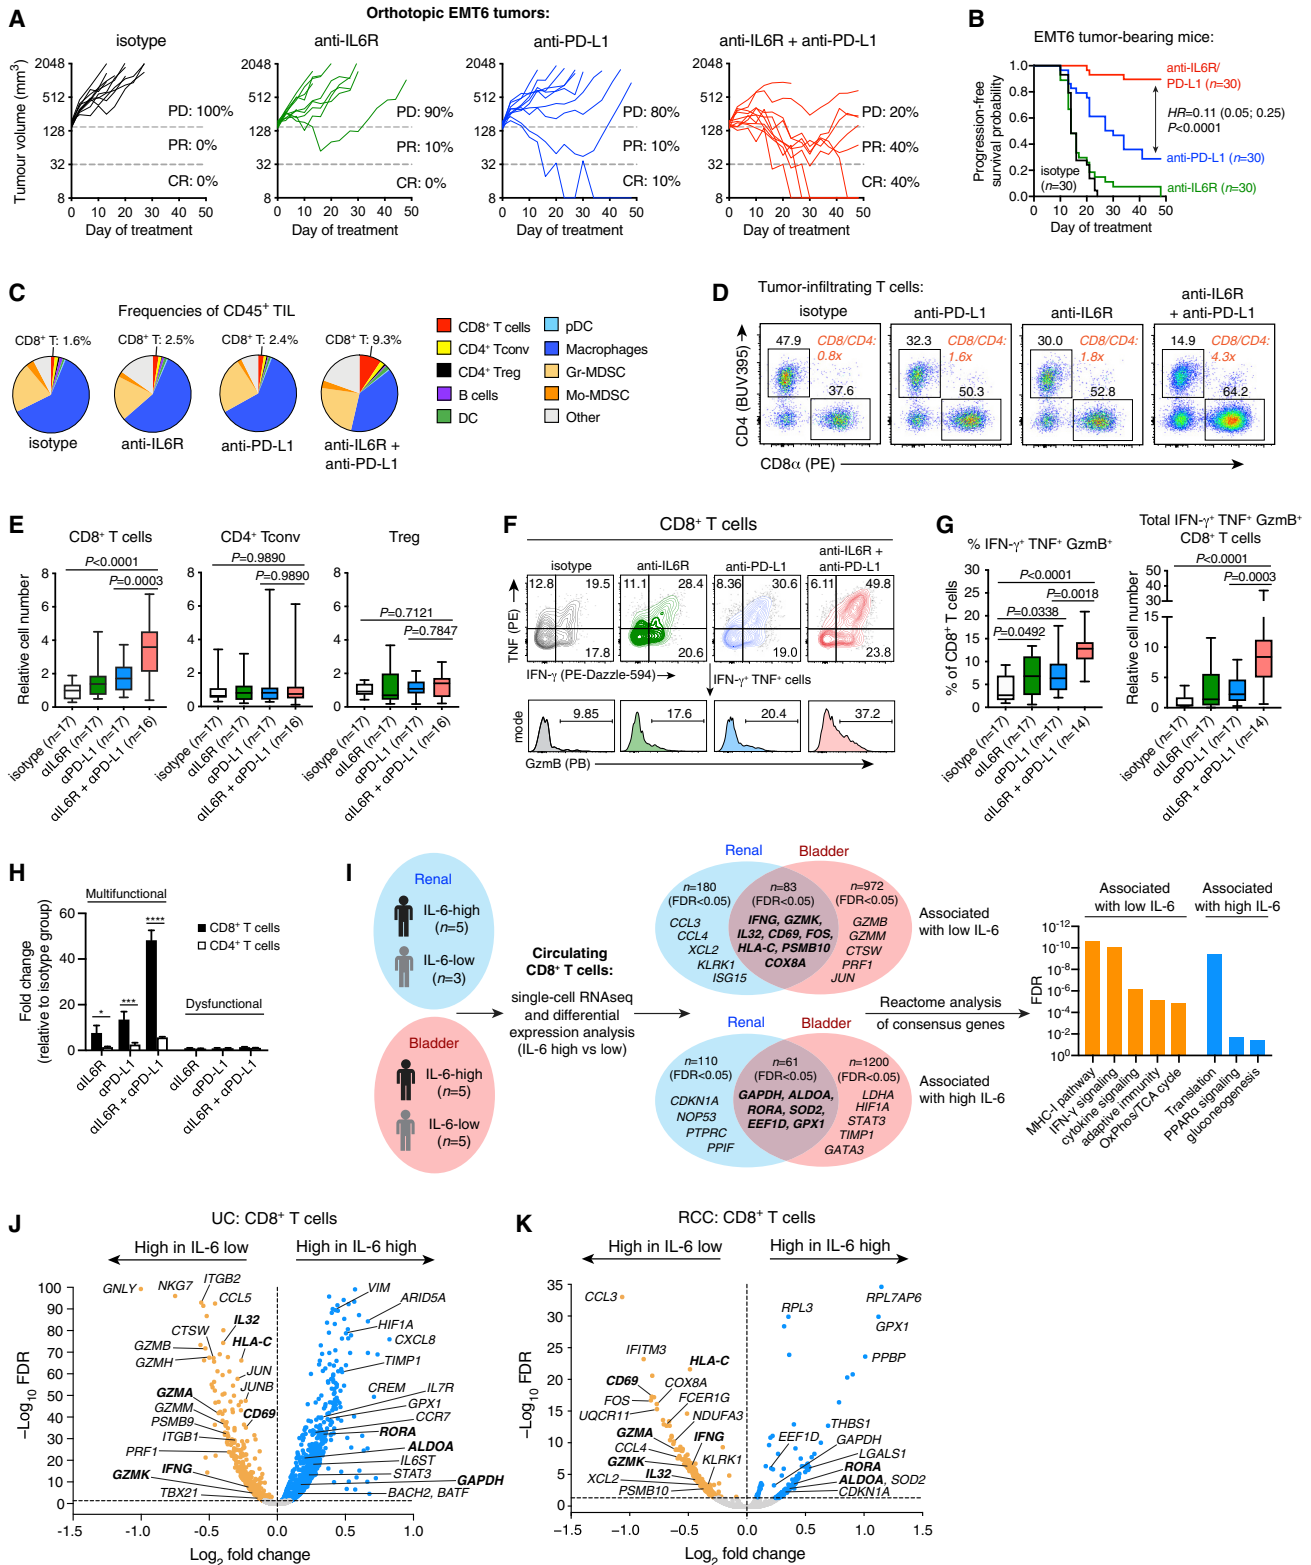

**Figure 2. IL-6 inhibits anti-PD-L1 efficacy and anti-tumor CTL response**

(A–H) Treatment of EMT6 tumor-bearing mice with antibodies targeting PD-L1 and/or IL6R. (A) Individual tumor growth curves (n = 10 per group) from one of three independent studies. PD, progressive disease; PR, partial response; CR, complete response. (B) Progression-free survival (time to 5x increase in tumor volume)

(legend continued on next page)



reduced OS in all treatment arms (Figure S1F). Similarly, in atezolizumab-treated patients with metastatic triple-negative breast cancer (TNBC) from the PCD4989g clinical trial,<sup>13</sup> or with metastatic urothelial bladder carcinoma (UC) from the IMvigor210 and IMvigor211 trials,<sup>14–16</sup> plasma IL-6 was elevated compared with healthy controls (Figure S1B) and associated with poor OS in multivariate survival analysis (Figures S1G–S1I). The IL-6-driven acute phase response protein CRP (C-reactive protein) was similarly associated with plasma IL-6 and poor OS in all three cancer types (Figures S1J–S1M).

### Dual blockade of IL6R and PD-L1 improves tumor control and CTL function

To determine if IL-6 affects anti-PD-L1 activity, we first examined the syngeneic EMT6 mouse model of TNBC (Figure S2A). EMT6 proliferation *in vitro* was unaffected by IL-6 (Figure S2B). Compared with either anti-IL6R or anti-PD-L1 monotherapy, combined blockade of IL6R and PD-L1 significantly improved tumor control and progression-free survival (HR = 0.11,  $p < 0.0001$ ; Figures 2A and 2B). Analysis of fluorescence-activated cell sorting (FACS)-purified tumor populations (EMT6 cells, T cells, myeloid cells, and fibroblasts) identified inflammatory Ly6C<sup>+</sup> cancer-associated fibroblasts as the main IL-6 producers (Figures S2C–S2D), consistent with prior studies.<sup>17–19</sup>

We next characterized tumor-infiltrating leukocytes at a time point prior to tumor regression (day 11). Combination therapy increased CTL frequency and abundance compared with anti-PD-L1 or anti-IL6R monotherapy, but it had little effect on regulatory T cells (Tregs), conventional CD4<sup>+</sup> T cells, or myeloid cells (Figures 2C–2E, S2E), resulting in a significantly increased CD8<sup>+</sup> to CD4<sup>+</sup> T cell ratio (Figure 2D). Combination therapy also increased the frequency and abundance of polyfunctional (IFN- $\gamma$ <sup>+</sup>TNF<sup>+</sup>GzmB<sup>+</sup>) CTLs (Figures 2F and 2G), with a comparatively modest effect on IFN- $\gamma$ <sup>+</sup>TNF<sup>+</sup> (Th1) CD4<sup>+</sup> T cells (Figure 2H). Dysfunctional (IFN- $\gamma$ <sup>-</sup>TNF<sup>-</sup>GzmB<sup>-</sup>) CTL abundance was unaffected (Figure 2H). While IL-6 can promote development of IL-17-producing CD4<sup>+</sup> (Th17) and CD8<sup>+</sup> (Tc17) T cells,<sup>2</sup> these were rare in tumors and draining lymph nodes, and their abundance was unaffected by any treatment (Figures S2F–S2H). We next evaluated two additional tumor models: CT26 (anti-PD-L1-resistant) and MC38 (partially anti-PD-L1-responsive). Consistent with EMT6, combination therapy in both models improved tumor control and enhanced anti-tumor CTL responses compared with anti-PD-L1 alone (Figures S2I–S2O).

### High IL-6 is associated with impaired CTL function in cancer patients

To explore the relationship between IL-6 and CTL in cancer patients, we selected patients from the IMmotion150 (RCC) and IMvigor210 (UC) trials with high (>10 pg/mL) or low plasma IL-6 and performed 10x single-cell RNA sequencing of their pre-treatment peripheral blood mononuclear cells. CTLs were identified from  $n = 8$  RCC patients ( $n = 5$  IL-6-high and  $n = 3$  IL-6-low) and  $n = 10$  UC patients ( $n = 5$  IL-6-high and  $n = 5$  IL-6-low; Figures S3A and S3B). Differential expression analysis comparing CTLs from IL-6-high versus IL-6-low patients identified numerous genes that were shared between the RCC and UC datasets (Figures 2I–2K). Concordant genes associated with high IL-6 were related to glucose metabolism and protein synthesis pathways, the latter driven largely by ribosomal genes, suggesting a transcriptionally quiescent state (Figure 2I). In contrast, CTLs from IL-6-low patients showed high expression of genes associated with activation and effector function (including *CD69*, *IL32*, *IFNG*, and *GZMK*), as well as enrichment of IFN signaling, the MHC-I pathway, and oxidative phosphorylation (OxPhos) (Figure 2I, Table S4).

Higher resolution clustering revealed several CTL subpopulations that associated strongly with plasma IL-6 status (Figures S3C–S3H). Clusters of polyfunctional effector cells expressing *IFNG*, *GZMB*, and various chemokines were identified in both the RCC and UC datasets (C5 and C2, respectively), and they occurred almost exclusively in IL-6-low patients. An additional terminal effector-like population was associated with low IL-6 in UC patients (C0), while IL-6-low RCC patients harbored cells with high expression of *GZMA*, *GZMK*, and *TCF7*, suggesting a state of early activation (C4). In contrast, the majority of cells from IL-6-high patients appeared to be inactive or functionally impaired, with low expression of *IFNG* and *GZMB* (e.g., UC cluster C4; Figures S3C–S3H).

### IL-6 inhibits CTL effector differentiation

We next performed a series of *in vitro* studies to explore the mechanistic basis of reduced CTL function under IL-6-high conditions. IL-6 can influence CTL metabolism and promote unconventional differentiation states (Tc17, Tc21, Tc22) under specific conditions,<sup>20–24</sup> but its impact on classical effector differentiation is not well understood. Consistent with our findings *in vivo*, IL-6 inhibited expression of IFN- $\gamma$ , TNF, and GzmB by CTL from OT-I TCR-transgenic mice after activation with SIINFEKL peptide (Figure 3A). IL-6 also reduced the rate of cell division, but this

of mice pooled from three independent studies, analyzed using log rank test. (C) Cellular composition of CD45<sup>+</sup> tumor-infiltrating leukocytes, from one of three experiments. (D) Balance of CD4<sup>+</sup> and CD8<sup>+</sup> T cells (CTLs) among total TCR $\beta$ <sup>+</sup> tumor-infiltrating T cells. Data are concatenated from  $n = 5$  mice per group, from one of three studies. (E) Relative abundance (normalized to tumor weight) of CTLs, conventional CD4<sup>+</sup> T cells, and regulatory (CD4<sup>+</sup> Foxp3<sup>+</sup>) T cells in EMT6 tumors, pooled from three experiments. Groups compared using one-way ANOVA with Holm-Sidak's multiple comparisons test. (F) Effector phenotype of tumor-infiltrating CTLs after re-stimulation with PMA/ionomycin. (G) Frequencies of polyfunctional cells among tumor-infiltrating CTLs (left panel), and their absolute abundance relative to isotype control (right panel). Data pooled from three experiments. Groups compared using one-way ANOVA with Holm-Sidak's multiple comparisons test. (H) Relative abundance (mean  $\pm$  SEM) of polyfunctional CTLs and IFN- $\gamma$ <sup>+</sup>TNF<sup>+</sup> CD4<sup>+</sup> T cells (multifunctional cells) vs. dysfunctional cells (IFN- $\gamma$ <sup>-</sup> TNF<sup>-</sup> GzmB<sup>-</sup> CD8<sup>+</sup> T cells, or IFN- $\gamma$ <sup>-</sup> TNF<sup>-</sup> CD4<sup>+</sup> T cells), from one of three experiments with  $n = 3–5$  per group. Groups compared using one-way ANOVA with Holm-Sidak's multiple comparisons test. \* $p = 0.0143$ , \*\*\* $p = 0.0001$ , \*\*\*\* $p < 0.0001$ .

(I–K) Single-cell RNA-seq analysis of pre-treatment peripheral blood CD8<sup>+</sup> T cells from patients with RCC (from IMmotion150) or UC (from IMvigor210). Differential expression analysis was performed on CD8<sup>+</sup> T cells from patients with high (>10 pg/mL) versus low plasma IL-6 (separate analyses for each cancer type). Genes identified as concordant in both cohorts ("consensus genes") were evaluated for Reactome pathway enrichment (I). Volcano plots of differential gene expression are shown for UC and RCC samples in (J) and (K), respectively.

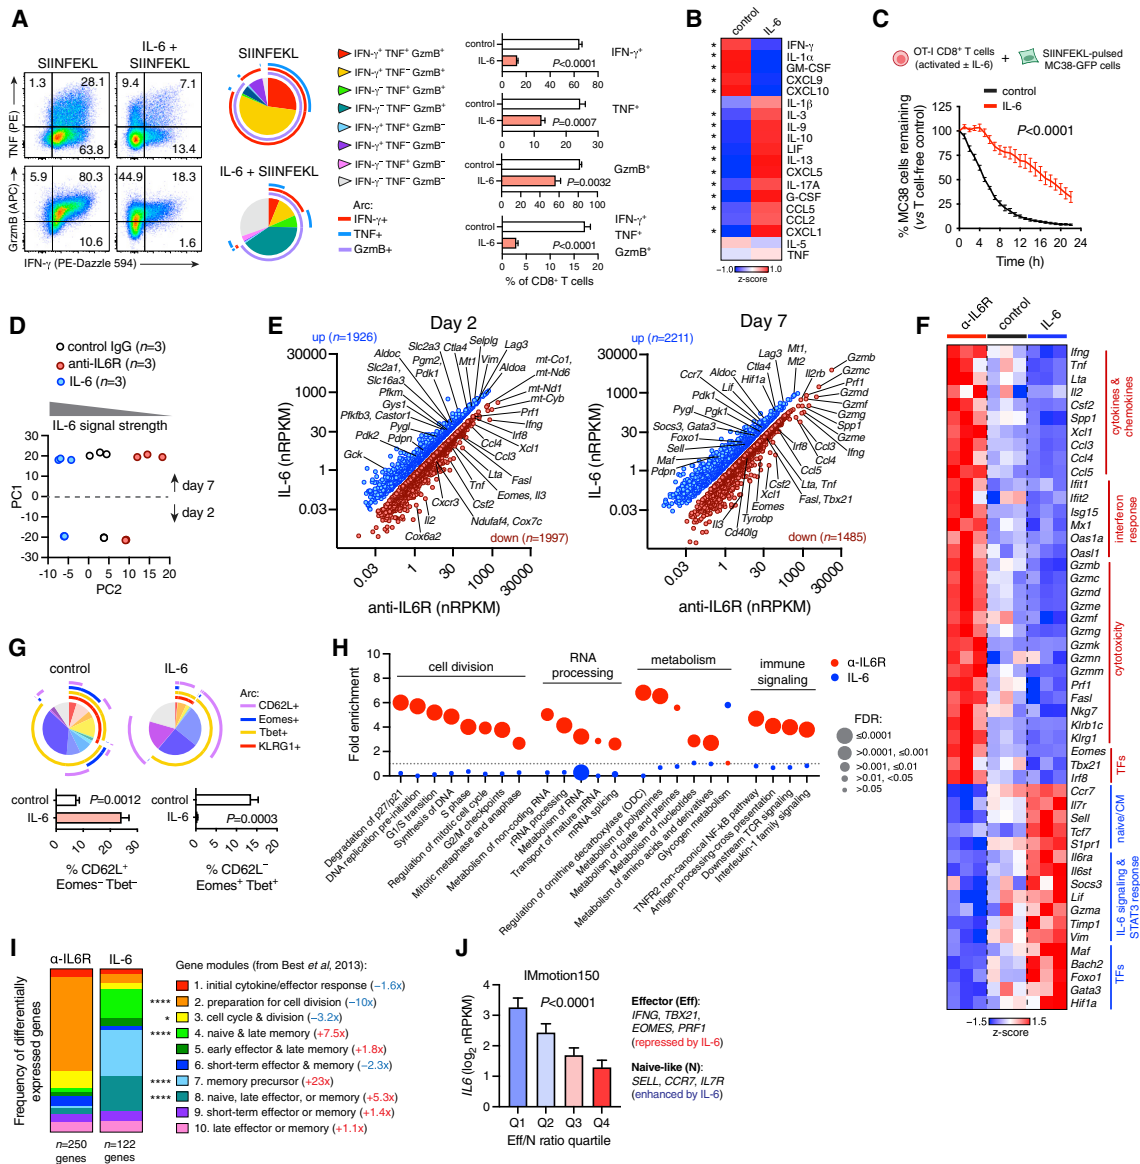

**Figure 3. IL-6 blocks CTL effector differentiation**

(A) Splenocytes from OT-I mice were stimulated with SIINFEKL peptide +/- IL-6 and analyzed by flow cytometry on day 7. Boolean analysis of IFN- $\gamma$ , TNF, and GzmB expression in CTLs is shown. Groups (mean +/- SEM of n = 4 technical replicates) were compared by t test and represent one of three independent experiments.

(B) Cytokine secretion (measured by Luminex multiplex assay) by FACS-purified CTLs activated with anti-CD3/CD28 +/- IL-6 for 3 days \*p < 0.05 (t test; n = 3 technical replicates per condition).

(C) OT-I CTLs were activated as described in (A) and co-cultured with SIINFEKL-pulsed MC38.GFP cells at a 5:1 effector/target ratio. MC38 destruction was quantified using Incucyte live-cell imaging. Groups compared using two-way ANOVA (n = 4 technical replicates per condition); data indicate mean +/- SEM, and are representative of three independent experiments.

(D-I) OT-I splenocytes activated with SIINFEKL peptide in the presence of IL-6, control IgG, or anti-IL6R antibody. CTLs were FACS-purified for RNA-seq analysis after 2 and 7 days (n = 3 technical replicates per condition/time point). Principal components analysis (PCA) is shown in (D). (E) Differentially expressed genes (FDR < 0.05 and absolute fold change > 1.5). (F) Heatmap of representative differentially expressed genes (day 7). (G) Boolean flow cytometry analysis of OT-I CTLs at day 7. Groups (mean +/- SEM of n = 4 technical replicates) compared using t tests, from one of three independent experiments. (H) Reactome pathway analysis of differentially expressed genes between IL-6- and anti-IL6R-treated cells at day 7. (I) Distribution of differentially expressed genes (day 7) among differentiation modules from Best et al.<sup>25</sup> \*p = 0.0239, \*\*\*\*p < 0.0001 (Fisher's exact test). Fold differences refer to IL-6 versus anti-IL6R treatment.

(J) Tumor RNA-seq analysis from IMmotion150. Gene modules (average Z scores) associated with effector or naive-like CTLs were used to calculate an effector/naive-like (Eff/N) ratio. IL6 expression across Eff/N quartiles (mean +/- SEM, n = 65-66 per group) was compared using one-way ANOVA.

effect was offset by improved cell viability (Figure S4A). We confirmed these findings by activating splenic CTLs from wild-type (WT) or IL6R.ko mice with anti-CD3/CD28 antibodies in the presence or absence of IL-6 (classical signaling) or hyper-IL-6 (a complex of IL-6 and soluble IL6R that activates *trans* signaling via direct engagement of gp130).<sup>3</sup> As expected, IL6R.ko T cells were unaffected by IL-6 but remained susceptible to functional impairment by hyper-IL-6 (Figures S4B and S4C). IL-6 inhibited secretion of IFN- $\gamma$ , GM-CSF, and IFN-responsive chemokines (CXCL9 and CXCL10), while it induced production of IL-10 and factors related to Th2/Th17 responses (IL-13 and IL-17A; Figure 3B). IL-6 repressed effector functions of both naive and memory CTLs (Figure S4D), and it had a similar effect on naive human CTLs (Figure S4E). Importantly, IL-6-conditioned OT-I CTLs were attenuated in their ability to kill SIINFEKL-loaded MC38 cells (Figure 3C).

While IL-6 inhibited CTL activation *in vitro* (Figure 3), IL6R blockade *in vivo* showed clear effects only in combination with anti-PD-L1 (Figure 2). Optimized T cell activation *in vitro* is likely more efficient than activation *in vivo*, which could influence the impact of IL-6. Indeed, PD-1 blockade *in vivo* was recently shown to enhance TCR signal strength in CD4<sup>+</sup> T cells.<sup>26</sup> To explore this concept further, we identified a sub-optimal SIINFEKL concentration (1 ng/mL) at which PD-L1 blockade enhanced OT-I CTL activation (Figure S4F). IL-6 had little effect on T cells activated with 1 ng/mL peptide alone but prevented expansion of IFN- $\gamma$ <sup>+</sup> CTLs driven by anti-PD-L1 (Figures S4G and S4H). Thus, the inhibitory effect of IL-6 is most apparent when T cells are activated by strong TCR/co-stimulatory signals.

### IL-6 promotes naive/memory-like features in CTLs

To further characterize the effects of IL-6, we activated CTLs in the presence of IL-6 or anti-IL6R antibody (to block endogenous signaling) and analyzed them by RNA-seq after 2 and 7 days (Figures 3D–3F). IL-6 suppressed expression of effector genes (e.g., *Irfng*, *Gzmb*, *Prf1*, *Klrg1*), chemokines, and transcription factors necessary for effector differentiation including *Tbx21* and *Eomes* (Figures 3E and 3F).<sup>27–29</sup> Conversely, IL-6 promoted expression of transcription factors that oppose effector differentiation, including *Foxo1* and *Bach2*,<sup>30,31</sup> and genes associated with naive or central memory (CM) cells such as *Sell*, *Ccr7*, and *Ilr* (Figures 3E and 3F). We confirmed by flow cytometry that IL-6 suppressed expression of Tbet, Eomes, and KLRG1, but it promoted retention of CD62L (Figure 3G). Reactome pathway analysis suggested that IL-6 suppressed processes related to immune signaling, cell division, metabolism, and RNA processing (Figure 3H, Table S5). Mapping IL-6-regulated genes onto transcriptional modules associated with different stages of CTL differentiation (Best et al.)<sup>25</sup> confirmed that IL-6 suppressed genes related to CTL activation and cell cycle engagement (modules 2/3), while it promoted genes related to naive, memory precursor, and late memory states (modules 4/7/8; Figure 3I). We next used tumor RNA-seq data from IMmotion150 to evaluate gene expression associated with effector (Eff) versus naive-like (N) CTLs. Intriguingly, *IL6* was associated inversely with the Eff/N expression ratio ( $p < 0.0001$ ; Figure 3J).

### IL-6 controls expression of diverse T cell regulators

To address whether IL-6 effects are reversible, we activated CTLs and stimulated them with IL-6 or hyper-IL-6 for the first 2 days only, or during days 3–7. IL-6/hyper-IL-6 signaling on days 0–2 attenuated effector function at day 7, whereas exposure after day 2 had no effect (Figure S4I). CTL downregulated *Irf6* expression (and to a lesser extent *Irf8*/gp130) after TCR stimulation, suggesting that T cells may lose sensitivity to IL-6 after priming (Figure S4J). However, primed cells remained capable of activating STAT3 in response to IL-6 or hyper-IL-6 (Figure S4K). Similarly, effector memory CTLs displayed lower IL6R and gp130 levels than naive or CM cells (Figure S4L) but remained capable of activating STAT3 in response to IL-6 (Figure S4M).

To determine if IL-6 pre-conditioning affects CTL differentiation upon subsequent TCR stimulation, we treated CTLs with IL-6 for 1 day; then we withdrew IL-6 and stimulated with anti-CD3/CD28. IL-6 pre-treatment suppressed effector function at day 3 (Figure S4N), suggesting that IL-6 alters expression of downstream regulators that provide durable control of T cell function, regardless of ongoing IL-6 signaling. To identify candidate regulators, we performed RNA-seq analysis of naive CTLs stimulated with IL-6 alone, or with IL-6 and anti-CD3/CD28 for 4 h (Figure 4A). Intriguingly, *Irfng* was induced by IL-6 at 4 h, confirming that proximal IL-6 signaling does not block effector function directly (Figure S4O). IL-6 suppressed expression of numerous genes with known importance for CTL activation, including co-stimulatory receptors (*Cd28*, *Cd226*) and mediators of dendritic cell cross-talk (*Cd40lg*, *Xcl1*), while it induced expression of co-inhibitory receptors (*Ctla4*, *Tigit*), repressors of inflammatory signaling (*Irf10* and SOCS-family members), and diverse transcription factors (*Batf*, *Foxo1*, *Hif1a*, *Tox2*; Figures 4B and 4C).

To identify mediators of IL-6-driven CTL dysfunction, we first confirmed a requirement for STAT3, the primary transcription factor activated by IL-6.<sup>3</sup> As expected, IFN- $\gamma$  production by STAT3-deficient CTLs was unaffected by IL-6 (Figure 4D). Among additional IL-6-regulated factors (Figures 4A–4C), we were intrigued by BATF (basic leucine zipper transcription factor, ATF-like), which restricts expression of CTL effector genes (including IFN- $\gamma$  and perforin)<sup>32</sup> and can be induced by IL-6.<sup>23,33</sup> Indeed, IL-6 triggered rapid STAT3-dependent BATF expression in CTLs (Figures 4E and 4F), and knockout of *Batf* using CRISPR-Cas9 abrogated the effect of IL-6 on CTL effector differentiation (Figures 4G and S4P). Thus, IL-6 may impair CTL function through STAT3-dependent induction of BATF.

### CTL-intrinsic IL-6 signaling inhibits anti-PD-L1 efficacy

To evaluate the impact of CTL-intrinsic IL-6 signaling *in vivo*, we adoptively transferred naive CTLs from CD90.1<sup>+</sup> OT-I mice that were *Irf6*<sup>wt/wt</sup> or *Irf6*<sup>-/-</sup> to WT CD90.2<sup>+</sup> recipients bearing ovalbumin-expressing EG.7 tumors. Combined with ovalbumin immunization (Figures S5A and S5B), PD-L1 blockade increased the polyfunctional anti-tumor CTL response in mice that received *Irf6*<sup>-/-</sup> OT-I cells, but not *Irf6*<sup>wt/wt</sup> cells (Figures S5C and S5D).

We next crossed *E8i.Cd8a.Cre* and *Irf6.loxP* mice to generate animals with CTL-restricted IL6R deficiency (CD8<sup>ΔIL6R</sup>; Figures 5A and S5E). CTLs from CD8<sup>ΔIL6R</sup> mice were unresponsive to classical IL-6 signaling, whereas CD4<sup>+</sup> T cells showed

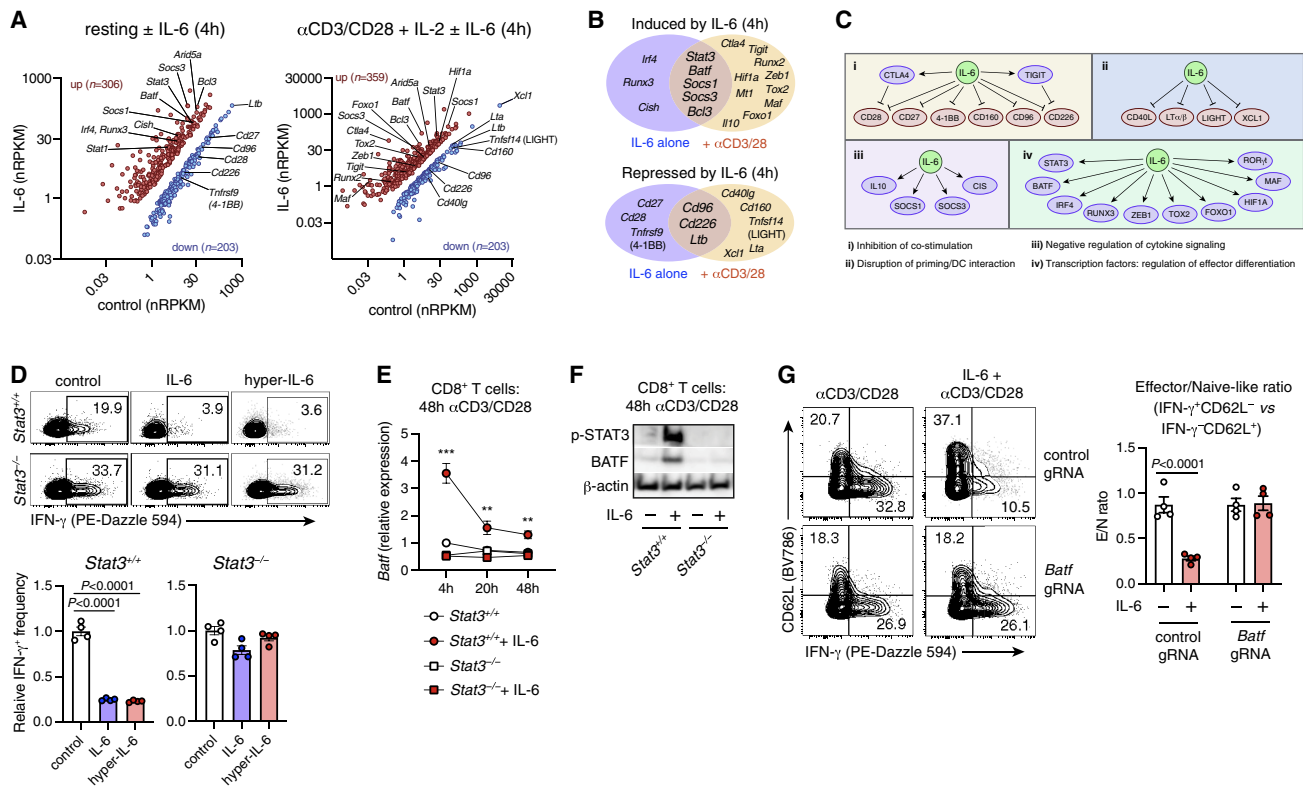

**Figure 4. IL-6 regulates CTLs via STAT3-dependent BATF induction**

(A–C) RNA-seq analysis of WT naive CTLs stimulated with IL-6 +/- anti-CD3/CD28 antibodies for 4 h. (A) Differentially expressed genes (FDR < 0.05 and absolute fold change > 2). (B) IL-6-regulated genes with potential roles in CTL differentiation, and their functional categorization (C). (D) IFN- $\gamma$  expression in WT or STAT3.ko CTLs (from CD4-Cre x *Ilg6<sup>loxP/loxP</sup>* mice) activated with anti-CD3/CD28 +/- IL-6 or hyper-IL-6 for 3 days. Groups (mean  $\pm$  SEM of n = 4 technical replicates) compared by t test; data representative of three independent experiments. (E) *Batf* mRNA expression (qRT-PCR) in WT or STAT3.ko CTLs activated +/- IL-6. \*\*p < 0.01, \*\*\*p < 0.001 (WT vs. STAT3.ko; t tests). Data points indicate mean +/- SEM of n = 4 technical replicates, from one of two independent experiments. (F) Western blot of BATF and p-STAT3 (Y705) in activated WT or STAT3.ko CTLs. Data represent one of two independent experiments. (G) BATF CRISPR-ko or control CTLs were activated +/- IL-6 and analyzed on day 3 (groups compared by t test; mean  $\pm$  SEM of n = 4 technical replicates). Data representative of two independent experiments.

normal IL-6 responsiveness (Figures S5F and S5G). MC38 tumors grew slowly in CD8<sup>ΔIL6R</sup> mice (Figure S5H); thus, only CD8<sup>ΔIL6R</sup> mice with relatively large tumors (comparable in size to those of WT mice) were selected for therapeutic studies. Compared with WT littermates, CD8<sup>ΔIL6R</sup> mice showed greater tumor control (Figure 5B) and stronger induction of anti-tumor CTL responses during PD-L1 blockade (Figures 5C–5F and S5I). This phenotype was not due to obvious baseline differences in T cell development or function (Figure S5J).

RNA-seq analysis of intratumoral CD8<sup>ΔIL6R</sup> versus WT CTLs revealed substantial differences in gene expression (Figure 5G). Anti-PD-L1 treatment induced genes related to IL-2, TGF $\beta$ , and VEGF signaling in WT CTLs, whereas it drove genes associated with IFN response and OxPhos in IL6R-deficient CTLs (Figure 5H, Table S5). We next evaluated genotype-dependent expression in CTLs from mice treated with anti-PD-L1. No differences were observed in co-inhibitory molecule expression (Figure S5K). IL6R-deficient CTLs expressed high amounts of genes related to IFN response, OxPhos, mitochondrial biogenesis, cell cycle,

DNA repair, and mRNA processing (Figure 5I) and low amounts of naive-associated factors (Figure S5L). Genes associated with CD8<sup>ΔIL6R</sup> CTL were found predominantly in modules 2 and 3 (early activation and cell division) from Best et al.,<sup>25</sup> whereas WT-associated genes were related to modules 7 and 8 (naive and memory precursor; Figure S5M). Overall, these findings suggest that during PD-L1 blockade, IL-6 acts on CTLs to restrain their effector differentiation and impair therapeutic efficacy.

## DISCUSSION

Our clinical observations corroborate the recently described prognostic association between plasma IL-6/CRP and poor survival of ICI-treated melanoma patients,<sup>6,34</sup> and they identify high tumor *IL6* expression as a predictor of poor atezolizumab monotherapy outcome in RCC. This relationship may be causal based on our experimental data, which demonstrate that IL-6 can impair anti-PD-L1 efficacy via direct functional inhibition of CTLs. Consistent with the association between plasma IL-6



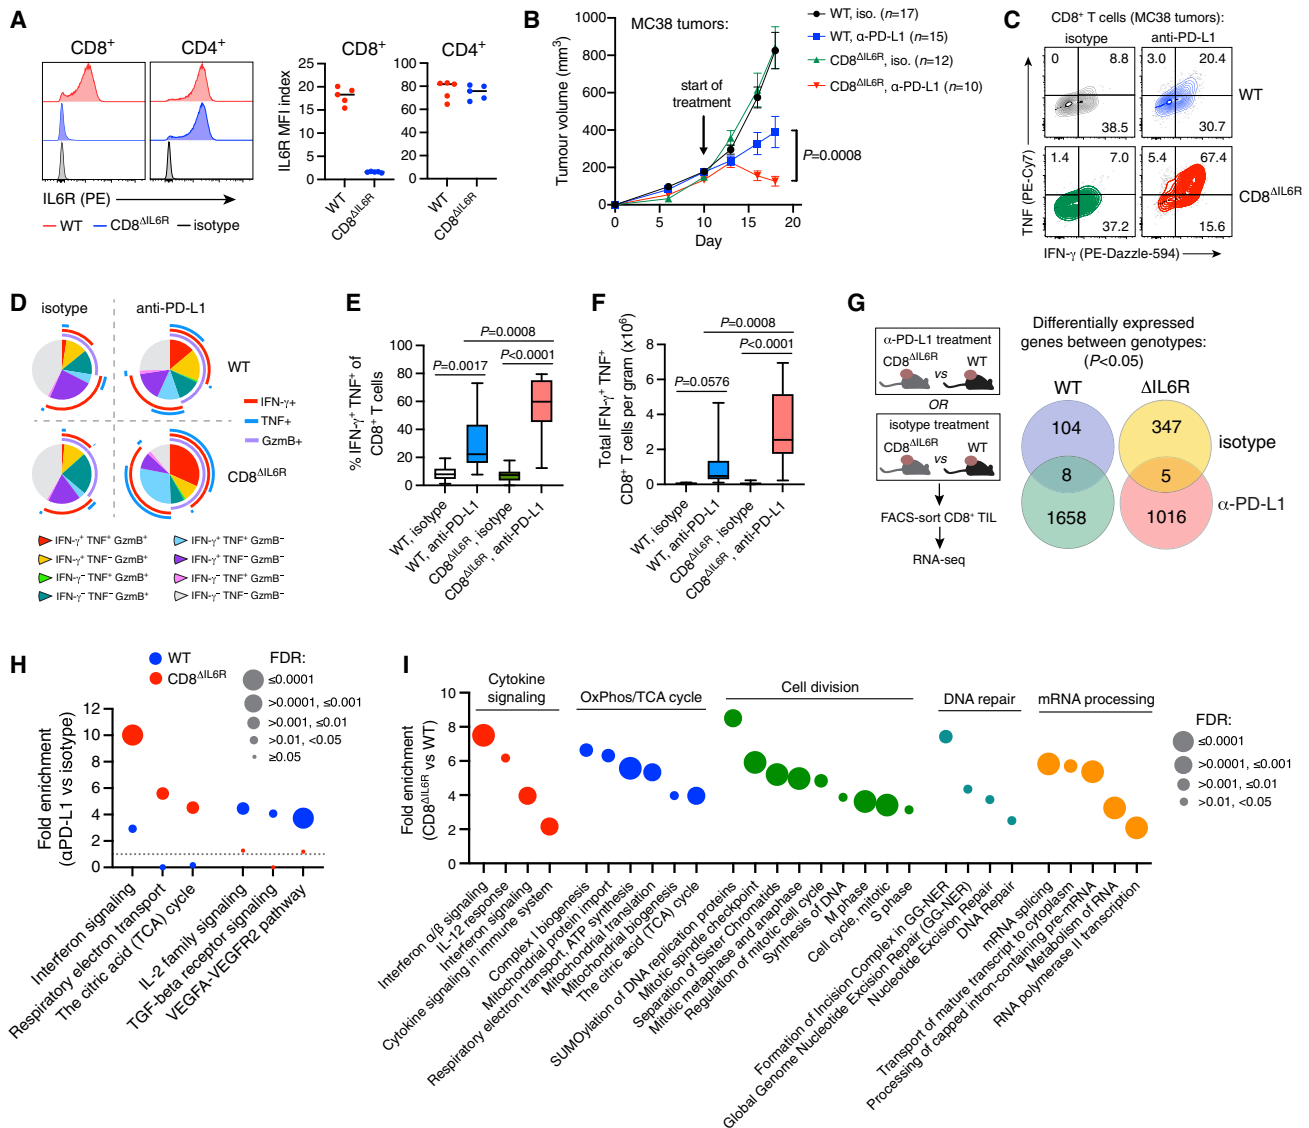

**Figure 5. CTL-intrinsic IL-6 signaling impairs anti-PD-L1 efficacy**

(A) IL6R expression on lymph node T cells from CD8<sup>ΔIL6R</sup> mice or WT littermate controls (n = 5 mice per group).

(B) Tumor growth (mean ± SEM) in CD8<sup>ΔIL6R</sup> mice and WT littermates treated with anti-PD-L1 or control antibodies, pooled from two independent studies and compared using two-way ANOVA.

(C–F) Cytokine expression in tumor-infiltrating CTLs after 1 week of treatment. Representative staining and Boolean analysis are shown in (C) and (D), respectively. Frequencies of IFN-γ<sup>+</sup> TNF<sup>+</sup> cells among tumor-infiltrating CTLs (E), and their absolute number (F), compared using one-way ANOVA with Holm-Sidak's multiple comparisons test (n = 9–12 mice per group). Data pooled from two independent studies.

(G–I) RNA-seq analysis of FACS-purified tumor-infiltrating CTLs from CD8<sup>ΔIL6R</sup> mice or WT littermates. Mice with established MC38 tumors (~150 mm<sup>3</sup>) were treated with anti-PD-L1 or control antibodies for 7 days (n = 4–5 mice per group). (G) Differentially expressed genes between WT and CD8<sup>ΔIL6R</sup> CTLs. Separate comparisons were made based on treatment. (H) Reactome pathway analysis of anti-PD-L1-driven protein-coding genes (p < 0.05) in WT and CD8<sup>ΔIL6R</sup> CTLs. (I) Reactome pathway analysis of the top 500 protein-coding genes (ranked by p value) that were significantly associated with CD8<sup>ΔIL6R</sup> CTLs during anti-PD-L1 treatment.

and CTL dysfunction in patients with COVID-19,<sup>35–38</sup> we identified polyfunctional effector CTLs almost exclusively in cancer patients with low plasma IL-6.

IL-6 was reported recently to also inhibit anti-CTLA4 efficacy in mouse tumor models.<sup>39</sup> Notably, while IL-6 blockade promoted anti-tumor immunity in combination with anti-CTLA4, it

ameliorated pathology driven by autoreactive Th17 responses,<sup>39</sup> suggesting that IL-6/IL6R blockade may have the added benefit of attenuating immune-related adverse events.

IL-6 can potentially influence anti-PD-L1 efficacy through several mechanisms, including support of cancer cell fitness,<sup>2,4</sup> inhibition of Th1 responses,<sup>5,8,10</sup> promotion of immunosuppressive



myeloid cells,<sup>7,9,40–42</sup> or disruption of conventional dendritic cells (cDCs).<sup>43</sup> In our studies, IL6R blockade had little impact on myeloid populations, and anti-IL6R/PD-L1 combination therapy did not affect Th1 responses reproducibly. In contrast, combination therapy enhanced CTL responses in several tumor models, consistent with the inhibitory effect of IL-6 on CTLs *in vitro*. While this could be related to impaired cDC1s,<sup>43</sup> we observed only modest changes in cDCs during combination therapy, and CTL-restricted IL6R deficiency enhanced anti-PD-L1 efficacy. Thus, although IL-6 can potentially influence several cell types to impair ICI activity, direct effects on CTLs may also be important for this process.

IL-6-mediated CTL inhibition required STAT3-dependent expression of BATF, consistent with prior observations implicating STAT3 and BATF as regulators of CTL function.<sup>22,32,44–46</sup> However, the complete mechanism *in vivo* is likely complex and context dependent, since IL-6 controls expression of numerous T cell regulators, including the immunotherapy targets CTLA4 and TIGIT. IL-6 also promoted expression of factors necessary for memory formation, including Foxo1, IL-10, and Bach2,<sup>30,31,44,47–49</sup> consistent with its role in promoting CD4<sup>+</sup> T cell memory.<sup>50</sup> Although CTLs with progenitor-like properties are important for sustained anti-tumor immunity,<sup>51</sup> successful immunotherapy requires their differentiation into cytotoxic effector cells.<sup>52–55</sup> Thus, by promoting progenitor/memory-like properties, IL-6 may support the longevity of anti-tumor CTLs but nevertheless limit ICI efficacy by impairing their development into effector cells.

Direct inhibition of CTLs by IL-6 is mechanistically distinct from other cytokine-dependent processes that can potentially inhibit ICI efficacy, including recruitment of inhibitory myeloid cells by VEGF,<sup>56</sup> IL-1 $\beta$ ,<sup>57</sup> IL-8,<sup>58,59</sup> or LIF,<sup>60</sup> suppression of tumor CTL infiltration by TGF $\beta$ ,<sup>61</sup> and support of Treg function by IL-23.<sup>62,63</sup> Importantly, therapies targeting IL-6 and IL6R are approved for several conditions including rheumatoid arthritis, cytokine release syndrome, giant cell arteritis, and multicentric Castleman disease.<sup>64</sup> Given the extensive clinical experience with IL-6 inhibitors, and the pressing need to improve upon existing immunotherapies, combination of ICIs with approved anti-IL-6/IL6R agents warrants investigation in cancer patients.

### Limitations of the study

Interpretation of our clinical data is limited by their retrospective nature, and prospective studies are necessary to fully evaluate the association of IL-6 with immunotherapy efficacy. IL-6 can potentially influence anti-PD-L1 response through many cell types, and our study does not provide a comprehensive assessment of its cell-intrinsic effects in non-CTLs. Further experiments with lineage-specific deletion of IL6R, combined with analyses such as single-cell RNA-seq, could provide additional mechanistic information. Finally, clinical studies of IL-6 pathway inhibitors in combination with ICIs will be necessary to fully evaluate the therapeutic translatability of our findings.

### STAR★METHODS

Detailed methods are provided in the online version of this paper and include the following:

- **KEY RESOURCES TABLE**
- **RESOURCE AVAILABILITY**
  - Lead contact
  - Materials availability
  - Data and code availability
- **EXPERIMENTAL MODEL AND SUBJECT DETAILS**
  - *In vivo* animal studies
  - Human clinical studies
  - Cell lines and primary cultures
- **METHOD DETAILS**
  - Clinical sample collection
  - RNAseq profiling of tumor tissue
  - Plasma IL-6 assay
  - PBMC isolation and scRNAseq analysis
  - Software versions related to clinical data analysis
  - IL6 *in situ* hybridization
  - *In vivo* tumor studies
  - DEC-OVA immunization
  - EMT6 cell proliferation *in vitro*
  - Tissue preparation and flow cytometry
  - T cell activation *ex vivo*
  - T cell cytotoxicity assays
  - Bulk RNA-seq analysis of mouse T cells
  - RNA extraction and qRT-PCR
  - Western blotting
- **QUANTIFICATION AND STATISTICAL ANALYSIS**
- **ADDITIONAL RESOURCES**

### SUPPLEMENTAL INFORMATION

Supplemental information can be found online at <https://doi.org/10.1016/j.xcrm.2022.100878>.

### ACKNOWLEDGMENTS

We thank the patients, their families, and all of the investigators and their staff involved in the IMmotion150, IMvigor210, IMvigor211, and PCD4989g trials. We thank Patrick Holder for valuable reagent support, Manmeet Singh, Yajun Chestnut, Alan Gutierrez, AnnChristine Thåström, Darren Tayama, Xiaodong Shen, and Soren Muller for technical assistance, the Genentech animal resources staff for assistance with animal husbandry and breeding, and Alex Ritter for kindly providing the MC38-GFP cell line. Funding for this study was provided by Genentech.

### AUTHOR CONTRIBUTIONS

N.R.W., M.A.H., K.Y., S.M., and L.M. contributed to the overall study design and wrote the paper. M.A.H., K.Y., L.L., S.K., S.M., Y.L., V.G., C.L., D.R., N.L., H.H., H.K., P.S.H., S.M., and L.M. made substantial contributions to the acquisition and analysis of clinical biomarker data. N.R.W., M.M., L.W., J.E.K., B.B., C.O., and J.P. designed all the pre-clinical experiments, and N.R.W., M.M., L.W., J.E.K., B.B., C.O., J.P., Y.S., Z.M., Y.J.C., B.B., E.J.F., J.Z., M.W., I.M., and S.J.T. analyzed the corresponding pre-clinical data. K.H., M.F., and P.W. supervised the analysis of the clinical data. D.F.M., J.E.R., T.P., and L.A.E. contributed to data interpretation, conception of clinical trial design, and served as principal investigators on the clinical studies. All authors contributed to data interpretation, discussion of results, and commented on the manuscript.

### DECLARATION OF INTERESTS

M.A.H., K.Y., L.W., J.E.K., L.L., Y.L., V.G., C.L., D.R., C.O., S.M., S.K., Y.J.C., J.P., Y.S., Z.M., B.B., E.J.F., N.L., H.K., J.Z., M.F., P.W., M.W., I.M., S.J.T.,

M.M., S.M., L.M., and N.R.W. are employees of Genentech, Inc. M.A.H., K.Y., L.W., J.E.K., L.L., Y.L., P.W., M.M., S.M., L.M., and N.R.W. are inventors on patents related to IL-6. P.S.H. is an employee of Foundation Medicine Inc. K.H. is an employee of Roche Products Ltd. D.F.M. reports a consulting/advisory role for Bristol-Myers Squibb, Merck, Roche/Genentech, Pfizer, Exelixis, Novartis, Eisai, X4 Pharmaceuticals, and Array BioPharma; he also reports that his home institution receives research funding from Prometheus Laboratories. T.P. reports honoraria and consulting/advisory roles with Roche/Genentech, Bristol-Myers Squibb, and Merck; consulting/advisory role with AstraZeneca and Novartis; research funding from AstraZeneca/MedImmune and Roche/Genentech; and other relationships with Ipsen and Bristol-Myers Squibb. L.E. reports honoraria from or consulting/advisory roles with AbbVie, Amgen, AstraZeneca, Bayer, Bristol Meyers Squibb, Celgene, Chugai, eTheRNA, Genentech, Gritstone, Medimmune, Molecuvax, Macrogenics, Novartis, Peregrine, Replimune, Roche, Silverback, Syndax, and Vaccinex; she reports that her home institution receives funding from Aduro Biotech, AstraZeneca, Breast Cancer Research Foundation, Bristol Meyers Squibb, Corvus, Department of Defense, EMD Serono, Genentech, HeritX, Inc., Maxcyte, Merck, National Cancer Institute, NSABP Foundation, Roche, Tempest, Translational Breast Cancer Research Consortium. J.E.R. has received non-financial support from Roche Genentech and consulting fees from Agensys, Eli Lilly, Sanofi, and Oncogene.

Received: April 21, 2022

Revised: October 14, 2022

Accepted: December 8, 2022

Published: January 3, 2023

## REFERENCES

- Morad, G., Helmink, B.A., Sharma, P., and Wargo, J.A. (2021). Hallmarks of response, resistance, and toxicity to immune checkpoint blockade. *Cell* 184, 5309–5337. <https://doi.org/10.1016/j.cell.2021.09.020>.
- Hunter, C.A., and Jones, S.A. (2015). IL-6 as a keystone cytokine in health and disease. *Nat. Immunol.* 16, 448–457. <https://doi.org/10.1038/ni.3153>.
- Schaper, F., and Rose-John, S. (2015). Interleukin-6: biology, signaling and strategies of blockade. *Cytokine Growth Factor Rev.* 26, 475–487. <https://doi.org/10.1016/j.cytogfr.2015.07.004>.
- Jones, S.A., and Jenkins, B.J. (2018). Recent insights into targeting the IL-6 cytokine family in inflammatory diseases and cancer. *Nat. Rev. Immunol.* 18, 773–789. <https://doi.org/10.1038/s41577-018-0066-7>.
- Tsakamoto, H., Fujieda, K., Miyashita, A., Fukushima, S., Ikeda, T., Kubo, Y., Senju, S., Ihn, H., Nishimura, Y., and Oshiumi, H. (2018). Combined blockade of IL6 and PD-1/PD-L1 signaling abrogates mutual regulation of their immunosuppressive effects in the tumor microenvironment. *Cancer Res.* 78, 5011–5022. <https://doi.org/10.1158/0008-5472.CAN-18-0118>.
- Laino, A.S., Woods, D., Vassallo, M., Qian, X., Tang, H., Wind-Rotolo, M., and Weber, J. (2020). Serum interleukin-6 and C-reactive protein are associated with survival in melanoma patients receiving immune checkpoint inhibition. *J. Immunother. Cancer* 8, e000842. <https://doi.org/10.1136/jitc-2020-000842>.
- Liu, H., Shen, J., and Lu, K. (2017). IL-6 and PD-L1 blockade combination inhibits hepatocellular carcinoma cancer development in mouse model. *Biochem. Biophys. Res. Commun.* 486, 239–244. <https://doi.org/10.1016/j.bbrc.2017.02.128>.
- Tsakamoto, H., Fujieda, K., Hirayama, M., Ikeda, T., Yuno, A., Matsumura, K., Fukuma, D., Araki, K., Mizuta, H., Nakayama, H., et al. (2017). Soluble IL6R expressed by myeloid cells reduces tumor-specific Th1 differentiation and drives tumor progression. *Cancer Res.* 77, 2279–2291. <https://doi.org/10.1158/0008-5472.CAN-16-2446>.
- Li, J., Xu, J., Yan, X., Jin, K., Li, W., and Zhang, R. (2018). Targeting interleukin-6 (IL-6) sensitizes anti-PD-L1 treatment in a colorectal cancer preclinical model. *Med. Sci. Monit.* 24, 5501–5508. <https://doi.org/10.12659/MSM.907439>.
- Mace, T.A., Shakya, R., Pitarresi, J.R., Swanson, B., McQuinn, C.W., Loftus, S., Nordquist, E., Cruz-Monserrate, Z., Yu, L., Young, G., et al. (2018). IL-6 and PD-L1 antibody blockade combination therapy reduces tumour progression in murine models of pancreatic cancer. *Gut* 67, 320–332. <https://doi.org/10.1136/gutjnl-2016-311585>.
- McDermott, D.F., Huseni, M.A., Atkins, M.B., Motzer, R.J., Rini, B.I., Escudier, B., Fong, L., Joseph, R.W., Pal, S.K., Reeves, J.A., et al. (2018). Clinical activity and molecular correlates of response to atezolizumab alone or in combination with bevacizumab versus sunitinib in renal cell carcinoma. *Nat. Med.* 24, 749–757. <https://doi.org/10.1038/s41591-018-0053-3>.
- Cristescu, R., Mogg, R., Ayers, M., Albright, A., Murphy, E., Yearley, J., Sher, X., Liu, X.Q., Lu, H., Nebozhyn, M., et al. (2018). Pan-tumor genomic biomarkers for PD-1 checkpoint blockade-based immunotherapy. *Science* 362, eaar3593. <https://doi.org/10.1126/science.aar3593>.
- Emens, L.A., Cruz, C., Eder, J.P., Braithe, F., Chung, C., Tolane, S.M., Kuter, I., Nanda, R., Cassier, P.A., Delord, J.-P., et al. (2019). Long-term clinical outcomes and biomarker analyses of atezolizumab therapy for patients with metastatic triple-negative breast cancer: a phase 1 study. *JAMA Oncol.* 5, 74–82. <https://doi.org/10.1001/jamaoncol.2018.4224>.
- Balar, A.V., Galsky, M.D., Rosenberg, J.E., Powles, T., Petrylak, D.P., Bellmunt, J., Loriot, Y., Necchi, A., Hoffman-Censits, J., Perez-Gracia, J.L., et al. (2017). Atezolizumab as first-line treatment in cisplatin-ineligible patients with locally advanced and metastatic urothelial carcinoma: a single-arm, multicentre, phase 2 trial. *Lancet* 389, 67–76. [https://doi.org/10.1016/S0140-6736\(16\)32455-2](https://doi.org/10.1016/S0140-6736(16)32455-2).
- Rosenberg, J.E., Hoffman-Censits, J., Powles, T., van der Heijden, M.S., Balar, A.V., Necchi, A., Dawson, N., O'Donnell, P.H., Balmanoukian, A., Loriot, Y., et al. (2016). Atezolizumab in patients with locally advanced and metastatic urothelial carcinoma who have progressed following treatment with platinum-based chemotherapy: a single-arm, multicentre, phase 2 trial. *Lancet* 387, 1909–1920. [https://doi.org/10.1016/S0140-6736\(16\)00561-4](https://doi.org/10.1016/S0140-6736(16)00561-4).
- Powles, T., Durán, I., van der Heijden, M.S., Loriot, Y., Vogelzang, N.J., De Giorgi, U., Oudard, S., Retz, M.M., Castellano, D., Bamias, A., et al. (2018). Atezolizumab versus chemotherapy in patients with platinum-treated locally advanced or metastatic urothelial carcinoma (IMvigor211): a multicentre, open-label, phase 3 randomised control trial. *Lancet* 391, 748–757. [https://doi.org/10.1016/S0140-6736\(17\)33297-X](https://doi.org/10.1016/S0140-6736(17)33297-X).
- Öhlund, D., Handly-Santana, A., Biffi, G., Elyada, E., Almeida, A.S., Ponz-Sarvise, M., Corbo, V., Oni, T.E., Hearn, S.A., Lee, E.J., et al. (2017). Distinct populations of inflammatory fibroblasts and myofibroblasts in pancreatic cancer. *J. Exp. Med.* 214, 579–596. <https://doi.org/10.1084/jem.20162024>.
- Biffi, G., Oni, T.E., Spielman, B., Hao, Y., Elyada, E., Park, Y., Preall, J., and Tuveson, D.A. (2019). IL-1-induced JAK/STAT signaling is antagonized by TGF-beta to shape CAF heterogeneity in pancreatic ductal adenocarcinoma. *Cancer Discov.* 9, 282–301. <https://doi.org/10.1158/2159-8290.CD-18-0710>.
- Dominguez, C.X., Müller, S., Keerthivasan, S., Koeppen, H., Hung, J., Gierke, S., Breart, B., Foreman, O., Bainbridge, T.W., Castiglioni, A., et al. (2020). Single-cell RNA sequencing reveals stromal evolution into LRRC15+ myofibroblasts as a determinant of patient response to cancer immunotherapy. *Cancer Discov.* 10, 232–253. <https://doi.org/10.1158/2159-8290.CD-19-0644>.
- Srenathan, U., Steel, K., and Taams, L.S. (2016). IL-17+ CD8+ T cells: differentiation, phenotype and role in inflammatory disease. *Immunol. Lett.* 178, 20–26. <https://doi.org/10.1016/j.imlet.2016.05.001>.
- Yang, R., Masters, A.R., Fortner, K.A., Champagne, D.P., Yanguas-Casás, N., Silberger, D.J., Weaver, C.T., Haynes, L., and Rincon, M. (2016). IL-6 promotes the differentiation of a subset of naive CD8+ T cells into IL-21-producing B helper CD8+ T cells. *J. Exp. Med.* 213, 2281–2291. <https://doi.org/10.1084/jem.20160417>.

22. Ciucci, T., Vacchio, M.S., and Bosselut, R. (2017). A STAT3-dependent transcriptional circuitry inhibits cytotoxic gene expression in T cells. *Proc. Natl. Acad. Sci. USA* *114*, 13236–13241. <https://doi.org/10.1073/pnas.1711160114>.
23. Brown, F.D., Sen, D.R., LaFleur, M.W., Godec, J., Lukacs-Kornek, V., Schildberg, F.A., Kim, H.-J., Yates, K.B., Ricoult, S.J.H., Bi, K., et al. (2019). Fibroblastic reticular cells enhance T cell metabolism and survival via epigenetic remodeling. *Nat. Immunol.* *20*, 1668–1680. <https://doi.org/10.1038/s41590-019-0515-x>.
24. St Paul, M., Saibil, S.D., Lien, S.C., Han, S., Sayad, A., Mulder, D.T., Garcia-Batres, C.R., Eford, A.R., Israni-Winger, K., Robert-Tissot, C., et al. (2020). IL6 induces an IL22+ CD8+ T-cell subset with potent antitumor function. *Cancer Immunol. Res.* *8*, 321–333. <https://doi.org/10.1158/2326-6066.CIR-19-0521>.
25. Best, J.A., Blair, D.A., Knell, J., Yang, E., Mayya, V., Doedens, A., Dustin, M.L., Goldrath, A.W., Immunological Genome Project Consortium; and Shinton, S.A., et al. (2013). Transcriptional insights into the CD8+ T cell response to infection and memory T cell formation. *Nat. Immunol.* *14*, 404–412. <https://doi.org/10.1038/ni.2536>.
26. Elliot, T.A.E., Jennings, E.K., Lecky, D.A.J., Thawait, N., Flores-Langarica, A., Copland, A., Maslowski, K.M., Wraith, D.C., and Bending, D. (2021). Antigen and checkpoint receptor engagement recalibrates T cell receptor signal strength. *Immunity* *54*, 2481–2496.e6. <https://doi.org/10.1016/j.immuni.2021.08.020>.
27. Intlekofer, A.M., Takemoto, N., Wherry, E.J., Longworth, S.A., Northrup, J.T., Palanivel, V.R., Mullen, A.C., Gasink, C.R., Kaech, S.M., Miller, J.D., et al. (2005). Effector and memory CD8+ T cell fate coupled by T-bet and eomesodermin. *Nat. Immunol.* *6*, 1236–1244. <https://doi.org/10.1038/ni1268>.
28. Zhu, Y., Ju, S., Chen, E., Dai, S., Li, C., Morel, P., Liu, L., Zhang, X., and Lu, B. (2010). T-bet and eomesodermin are required for T cell-mediated antitumor immune responses. *J. Immunol.* *185*, 3174–3183. <https://doi.org/10.4049/jimmunol.1000749>.
29. Paley, M.A., Kroy, D.C., Odorizzi, P.M., Johnnidis, J.B., Dolfi, D.V., Barnett, B.E., Bikoff, E.K., Robertson, E.J., Lauer, G.M., Reiner, S.L., and Wherry, E.J. (2012). Progenitor and terminal subsets of CD8+ T cells cooperate to contain chronic viral infection. *Science* *338*, 1220–1225. <https://doi.org/10.1126/science.1229620>.
30. Roychoudhuri, R., Clever, D., Li, P., Wakabayashi, Y., Quinn, K.M., Klebanoff, C.A., Ji, Y., Sukumar, M., Eil, R.L., Yu, Z., et al. (2016). BACH2 regulates CD8(+) T cell differentiation by controlling access of AP-1 factors to enhancers. *Nat. Immunol.* *17*, 851–860. <https://doi.org/10.1038/ni.3441>.
31. Delpoux, A., Lai, C.-Y., Hedrick, S.M., and Doedens, A.L. (2017). FOXO1 opposition of CD8+ T cell effector programming confers early memory properties and phenotypic diversity. *Proc. Natl. Acad. Sci. USA* *114*, E8865–E8874. <https://doi.org/10.1073/pnas.1618916114>.
32. Kurachi, M., Barnitz, R.A., Yosef, N., Odorizzi, P.M., Dilorio, M.A., Lemieux, M.E., Yates, K., Godec, J., Klatt, M.G., Regev, A., et al. (2014). The transcription factor BATF operates as an essential differentiation checkpoint in early effector CD8+ T cells. *Nat. Immunol.* *15*, 373–383. <https://doi.org/10.1038/ni.2834>.
33. Pham, D., Moseley, C.E., Gao, M., Savic, D., Winstead, C.J., Sun, M., Kee, B.L., Myers, R.M., Weaver, C.T., and Hatton, R.D. (2019). Batf pioneers the reorganization of chromatin in developing effector T cells via Ets1-dependent recruitment of Ctcf. *Cell Rep.* *29*, 1203–1220.e7. <https://doi.org/10.1016/j.celrep.2019.09.064>.
34. Yoshida, T., Ichikawa, J., Giurouli, I., Laino, A.S., Hao, Y., Krogsgaard, M., Vassallo, M., Woods, D.M., Stephen Hodi, F., and Weber, J. (2020). C reactive protein impairs adaptive immunity in immune cells of patients with melanoma. *J. Immunother. Cancer* *8*, e000234. <https://doi.org/10.1136/jitc-2019-000234>.
35. Diao, B., Wang, C., Tan, Y., Chen, X., Liu, Y., Ning, L., Chen, L., Li, M., Liu, Y., Wang, G., et al. (2020). Reduction and functional exhaustion of T cells in patients with coronavirus disease 2019 (COVID-19). *Front. Immunol.* *11*, 827. <https://doi.org/10.3389/fimmu.2020.00827>.
36. Luo, M., Liu, J., Jiang, W., Yue, S., Liu, H., and Wei, S. (2020). IL-6 and CD8+ T cell counts combined are an early predictor of in-hospital mortality of patients with COVID-19. *JCI Insight* *5*, e139024. <https://doi.org/10.1172/jci.insight.139024>.
37. Mazzoni, A., Salvati, L., Maggi, L., Capone, M., Vanni, A., Spinicci, M., Mencarini, J., Caporale, R., Peruzzi, B., Antonelli, A., et al. (2020). Impaired immune cell cytotoxicity in severe COVID-19 is IL-6 dependent. *J. Clin. Invest.* *130*, 4694–4703. <https://doi.org/10.1172/JCI138554>.
38. Tian, J., Zhang, M., Jin, M., Zhang, F., Chu, Q., Wang, X., Chen, C., Yue, H., Zhang, L., Du, R., et al. (2021). Repurposed tocilizumab in patients with severe COVID-19. *J. Immunol.* *206*, 599–606. <https://doi.org/10.4049/jimmunol.2000981>.
39. Hailemichael, Y., Johnson, D.H., Abdel-Wahab, N., Foo, W.C., Bentebibel, S.E., Daher, M., Haymaker, C., Wani, K., Saberian, C., Ogata, D., et al. (2022). Interleukin-6 blockade abrogates immunotherapy toxicity and promotes tumor immunity. *Cancer Cell* *40*, 509–523.e6. <https://doi.org/10.1016/j.ccell.2022.04.004>.
40. Narita, Y., Kitamura, H., Wakita, D., Sumida, K., Masuko, K., Terada, S., Nakano, K., and Nishimura, T. (2013). The key role of IL-6-arginase cascade for inducing dendritic cell-dependent CD4(+) T cell dysfunction in tumor-bearing mice. *J. Immunol.* *190*, 812–820. <https://doi.org/10.4049/jimmunol.1103797>.
41. Ohno, Y., Kitamura, H., Takahashi, N., Ohtake, J., Kaneumi, S., Sumida, K., Homma, S., Kawamura, H., Minagawa, N., Shibasaki, S., and Takeuchi, A. (2016). IL-6 down-regulates HLA class II expression and IL-12 production of human dendritic cells to impair activation of antigen-specific CD4(+) T cells. *Cancer Immunol. Immunother.* *65*, 193–204. <https://doi.org/10.1007/s00262-015-1791-4>.
42. Sumida, K., Wakita, D., Narita, Y., Masuko, K., Terada, S., Watanabe, K., Satoh, T., Kitamura, H., and Nishimura, T. (2012). Anti-IL-6 receptor mAb eliminates myeloid-derived suppressor cells and inhibits tumor growth by enhancing T-cell responses. *Eur. J. Immunol.* *42*, 2060–2072. <https://doi.org/10.1002/eji.201142335>.
43. Lin, J.H., Huffman, A.P., Wattenberg, M.M., Walter, D.M., Carpenter, E.L., Feldser, D.M., Beatty, G.L., Furth, E.E., and Vonderheide, R.H. (2020). Type 1 conventional dendritic cells are systemically dysregulated early in pancreatic carcinogenesis. *J. Exp. Med.* *217*, e20190673. <https://doi.org/10.1084/jem.20190673>.
44. Cui, W., Liu, Y., Weinstein, J.S., Craft, J., and Kaech, S.M. (2011). An interleukin-21- interleukin-10-STAT3 pathway is critical for functional maturation of memory CD8+ T cells. *Immunity* *35*, 792–805. <https://doi.org/10.1016/j.immuni.2011.09.017>.
45. Yue, C., Shen, S., Deng, J., Priceman, S.J., Li, W., Huang, A., and Yu, H. (2015). STAT3 in CD8+ T cells inhibits their tumor accumulation by down-regulating CXCR3/CXCL10 Axis. *Cancer Immunol. Res.* *3*, 864–870. <https://doi.org/10.1158/2326-6066.CIR-15-0014>.
46. Zhang, C., Yue, C., Herrmann, A., Song, J., Egelston, C., Wang, T., Zhang, Z., Li, W., Lee, H., Aftabizadeh, M., et al. (2020). STAT3 activation-induced fatty acid oxidation in CD8+ T effector cells is critical for obesity-promoted breast tumor growth. *Cell Metab.* *31*, 148–161.e5. <https://doi.org/10.1016/j.cmet.2019.10.013>.
47. Rao, R.R., Li, Q., Gubbels Bupp, M.R., and Shrikant, P.A. (2012). Transcription factor Foxo1 represses T-bet-mediated effector functions and promotes memory CD8+ T cell differentiation. *Immunity* *36*, 374–387. <https://doi.org/10.1016/j.immuni.2012.01.015>.
48. Hess Michelini, R., Doedens, A.L., Goldrath, A.W., and Hedrick, S.M. (2013). Differentiation of CD8 memory T cells depends on Foxo1. *J. Exp. Med.* *210*, 1189–1200. <https://doi.org/10.1084/jem.20130392>.
49. Herndler-Brandstetter, D., Ishigame, H., Shinnakasu, R., Plajer, V., Stecher, C., Zhao, J., Lietzenmayer, M., Kroehling, L., Takumi, A., Kometani, K., et al. (2018). KLRG1+ effector CD8+ T cells lose KLRG1, differentiate into all memory T cell lineages, and convey enhanced protective

- immunity. *Immunity* 48, 716–729.e8. <https://doi.org/10.1016/j.immuni.2018.03.015>.
50. Nish, S.A., Schenten, D., Wunderlich, F.T., Pope, S.D., Gao, Y., Hoshi, N., Yu, S., Yan, X., Lee, H.K., Paskan, L., et al. (2014). T cell-intrinsic role of IL-6 signaling in primary and memory responses. *Elife* 3, e01949. <https://doi.org/10.7554/eLife.01949>.
  51. Kallies, A., Zehn, D., and Utzschneider, D.T. (2020). Precursor exhausted T cells: key to successful immunotherapy? *Nat. Rev. Immunol.* 20, 128–136. <https://doi.org/10.1038/s41577-019-0223-7>.
  52. Jansen, C.S., Prokhnivska, N., Master, V.A., Sanda, M.G., Carlisle, J.W., Bilen, M.A., Cardenas, M., Wilkinson, S., Lake, R., Sowalsky, A.G., et al. (2019). An intra-tumoral niche maintains and differentiates stem-like CD8 T cells. *Nature* 576, 465–470. <https://doi.org/10.1038/s41586-019-1836-5>.
  53. Kurtulus, S., Madi, A., Escobar, G., Klapholz, M., Nyman, J., Christian, E., Pawlak, M., Dionne, D., Xia, J., Rozenblatt-Rosen, O., et al. (2019). Checkpoint blockade immunotherapy induces dynamic changes in PD-1–CD8+ tumor-infiltrating T cells. *Immunity* 50, 181–194.e6. <https://doi.org/10.1016/j.immuni.2018.11.014>.
  54. Siddiqui, I., Schaeuble, K., Chennupati, V., Fuertes Marraco, S.A., Calderon-Copete, S., Pais Ferreira, D., Carmona, S.J., Scarpellino, L., Gfeller, D., Pradervand, S., et al. (2019). Intratumoral Tcf1+PD-1+CD8+ T cells with stem-like properties promote tumor control in response to vaccination and checkpoint blockade immunotherapy. *Immunity* 50, 195–211.e10. <https://doi.org/10.1016/j.immuni.2018.12.021>.
  55. Krishna, S., Lowery, F.J., Copeland, A.R., Bahadiroglu, E., Mukherjee, R., Jia, L., Anibal, J.T., Sachs, A., Adebola, S.O., Gurusamy, D., et al. (2020). Stem-like CD8 T cells mediate response of adoptive cell immunotherapy against human cancer. *Science* 370, 1328–1334. <https://doi.org/10.1126/science.abb9847>.
  56. Hegde, P.S., Wallin, J.J., and Mancao, C. (2018). Predictive markers of anti-VEGF and emerging role of angiogenesis inhibitors as immunotherapeutics. *Semin. Cancer Biol.* 52, 117–124. <https://doi.org/10.1016/j.semcancer.2017.12.002>.
  57. Kaplanov, I., Carmi, Y., Kornetsky, R., Shemesh, A., Shurin, G.V., Shurin, M.R., Dinarello, C.A., Voronov, E., and Apte, R.N. (2019). Blocking IL-1 $\beta$  reverses the immunosuppression in mouse breast cancer and synergizes with anti-PD-1 for tumor abrogation. *Proc. Natl. Acad. Sci. USA* 116, 1361–1369. <https://doi.org/10.1073/pnas.1812266115>.
  58. Alfaro, C., Teixeira, A., Oñate, C., Pérez, G., Sanmamed, M.F., Andueza, M.P., Alignani, D., Labiano, S., Azpilikueta, A., Rodriguez-Paulete, A., et al. (2016). Tumor-produced interleukin-8 attracts human myeloid-derived suppressor cells and elicits extrusion of neutrophil extracellular traps (NETs). *Clin. Cancer Res.* 22, 3924–3936. <https://doi.org/10.1158/1078-0432.CCR-15-2463>.
  59. Dominguez, C., McCampbell, K.K., David, J.M., and Palena, C. (2017). Neutralization of IL-8 decreases tumor PMN-MDSCs and reduces mesenchymalization of claudin-low triple-negative breast cancer. *JCI Insight* 2, e94296. <https://doi.org/10.1172/jci.insight.94296>.
  60. Pascual-García, M., Bonfill-Teixidor, E., Planas-Rigol, E., Rubio-Perez, C., Iurlaro, R., Arias, A., Cuartas, I., Sala-Hojman, A., Escudero, L., Martínez-Ricarte, F., et al. (2019). LIF regulates CXCL9 in tumor-associated macrophages and prevents CD8<sup>+</sup> T cells tumor-infiltration impairing anti-PD1 therapy. *Nat. Commun.* 10, 2416. <https://doi.org/10.1038/s41467-019-10369-9>.
  61. Mariathasan, S., Turley, S.J., Nickles, D., Castiglioni, A., Yuen, K., Wang, Y., Kadel, E.E., Koepfen, H., Astarita, J.L., Cubas, R., et al. (2018). TGF $\beta$  attenuates tumour response to PD-L1 blockade by contributing to exclusion of T cells. *Nature* 554, 544–548. <https://doi.org/10.1038/nature25501>.
  62. Kortylewski, M., Xin, H., Kujawski, M., Lee, H., Liu, Y., Harris, T., Drake, C., Pardoll, D., and Yu, H. (2009). Regulation of the IL-23 and IL-12 balance by Stat3 signaling in the tumor microenvironment. *Cancer Cell* 15, 114–123. <https://doi.org/10.1016/j.ccr.2008.12.018>.
  63. Wight, A.E., Sido, J.M., Degryse, S., Ao, L., Nakagawa, H., Qiu Vivian, Y., Shen, X., Oseghali, O., Kim, H.J., and Cantor, H. (2022). Antibody-mediated blockade of the IL23 receptor destabilizes intratumoral regulatory T cells and enhances immunotherapy. *Proc. Natl. Acad. Sci. USA* 119, e2200757119. <https://doi.org/10.1073/pnas.2200757119>.
  64. Garbers, C., Heink, S., Korn, T., and Rose-John, S. (2018). Interleukin-6: designing specific therapeutics for a complex cytokine. *Nat. Rev. Drug Discov.* 17, 395–412. <https://doi.org/10.1038/nrd.2018.45>.
  65. Hogquist, K.A., Jameson, S.C., Heath, W.R., Howard, J.L., Bevan, M.J., and Carlone, F.R. (1994). T cell receptor antagonist peptides induce positive selection. *Cell* 76, 17–27. [https://doi.org/10.1016/0092-8674\(94\)90169-4](https://doi.org/10.1016/0092-8674(94)90169-4).
  66. Moh, A., Iwamoto, Y., Chai, G.-X., Zhang, S.S.M., Kano, A., Yang, D.D., Zhang, W., Wang, J., Jacoby, J.J., Gao, B., et al. (2007). Role of STAT3 in liver regeneration: survival, DNA synthesis, inflammatory reaction and liver mass recovery. *Lab. Invest.* 87, 1018–1028. <https://doi.org/10.1038/labinvest.3700630>.
  67. Lee, P.P., Fitzpatrick, D.R., Beard, C., Jessup, H.K., Lehar, S., Makar, K.W., Pérez-Melgosa, M., Sweetser, M.T., Schlissel, M.S., Nguyen, S., et al. (2001). A critical role for Dnmt1 and DNA methylation in T cell development, function, and survival. *Immunity* 15, 763–774. [https://doi.org/10.1016/s1074-7613\(01\)00227-8](https://doi.org/10.1016/s1074-7613(01)00227-8).
  68. McFarland-Mancini, M.M., Funk, H.M., Paluch, A.M., Zhou, M., Giridhar, P.V., Mercer, C.A., Kozma, S.C., and Drew, A.F. (2010). Differences in wound healing in mice with deficiency of IL-6 versus IL-6 receptor. *J. Immunol.* 184, 7219–7228. <https://doi.org/10.4049/jimmunol.0901929>.
  69. Maekawa, Y., Minato, Y., Ishifune, C., Kurihara, T., Kitamura, A., Kojima, H., Yagita, H., Sakata-Yanagimoto, M., Saito, T., Taniuchi, I., et al. (2008). Notch2 integrates signaling by the transcription factors RBP-J and CREB1 to promote T cell cytotoxicity. *Nat. Immunol.* 9, 1140–1147. <https://doi.org/10.1038/ni.1649>.
  70. Gupta, V., Davancaze, T., Good, J., Kalia, N., Anderson, M., Wallin, J.J., Brady, A., Song, A., and Xu, W. (2016). Bioanalytical qualification of clinical biomarker assays in plasma using a novel multi-analyte Simple Plex™ platform. *Bioanalysis* 8, 2415–2428. <https://doi.org/10.4155/bio-2016-0196>.
  71. Jassal, B., Matthews, L., Viteri, G., Gong, C., Lorente, P., Fabregat, A., Sidiropoulos, K., Cook, J., Gillespie, M., Haw, R., et al. (2020). The reactome pathway knowledgebase. *Nucleic Acids Res.* 48, D498–D503. <https://doi.org/10.1093/nar/gkz1031>.
  72. Oh, S.A., Seki, A., and Rutz, S. (2019). Ribonucleoprotein transfection for CRISPR/Cas9-Mediated gene knockout in primary T cells. *Curr. Protoc. Immunol.* 124, e69. <https://doi.org/10.1002/cpim.69>.
  73. Ritchie, M.E., Phipson, B., Wu, D., Hu, Y., Law, C.W., Shi, W., and Smyth, G.K. (2015). Limma powers differential expression analyses for RNA-sequencing and microarray studies. *Nucleic Acids Res.* 43, e47. <https://doi.org/10.1093/nar/gkv007>.



STAR★METHODS

KEY RESOURCES TABLE

| REAGENT or RESOURCE                                      | SOURCE                    | IDENTIFIER                      |
|----------------------------------------------------------|---------------------------|---------------------------------|
| <b>Antibodies</b>                                        |                           |                                 |
| Anti-PD-L1 (mouse IgG2A, clone 6E11)                     | Genentech                 | N/A                             |
| Anti-IL6R (mouse IgG2A, clone MR16-1)                    | Genentech                 | N/A                             |
| Mouse IgG2A isotype control (anti-gp120)                 | Genentech                 | N/A                             |
| Anti-mouse-DEC205-ovalbumin                              | Genentech                 | N/A                             |
| Anti-mouse-CD40 (clone FGK4.5)                           | Genentech                 | N/A                             |
| Rabbit anti-phospho-STAT3 (Y705; clone D3A7)             | Cell Signaling Technology | Cat#9145; RRID:AB_2491009       |
| Rabbit anti-STAT3 (clone D1B2J)                          | Cell Signaling Technology | Cat#30835; RRID:AB_2798995      |
| Mouse anti-β-actin-HRP (clone AC-15)                     | Sigma-Aldrich             | Cat#A3854; RRID:AB_262011       |
| Rabbit anti-BATF (clone D7C5)                            | Cell Signaling Technology | Cat#8638; RRID:AB_11141425      |
| Hamster anti-mouse CD3e (clone 145-2C11)                 | BD Biosciences            | Cat#550275; RRID:AB_393572      |
| Hamster anti-mouse CD28 (clone 37.51)                    | BD Biosciences            | Cat#553295; RRID:AB_394764      |
| Rat anti-mouse CD16/32 (clone 2.4G2)                     | BD Biosciences            | Cat#553142; RRID:AB_394657      |
| Anti-mouse CD45-BV510 (clone 30-F11)                     | BD Biosciences            | Cat#563891; RRID:AB_2734134     |
| Anti-mouse Thy1.2-efluor450 (clone 53-2.1)               | eBioscience               | Cat#48-0902-82; RRID:AB_1272200 |
| Anti-mouse Thy1.2-alexafluor700 (clone 53-2.1)           | Biolegend                 | Cat#140324; RRID:AB_2566740     |
| Anti-mouse Thy1.1-alexafluor488 (clone OX-7)             | Biolegend                 | Cat#202506; RRID:AB_492882      |
| Anti-mouse CD3e-PE/Cy5.5 (clone 145-2C11)                | Biolegend                 | Cat#100310; RRID:AB_312675      |
| Anti-mouse CD4-BUV395 (clone GK1.5)                      | BD Biosciences            | Cat#563790; RRID:AB_2738426     |
| Anti-mouse CD4-BV785 (clone GK1.5)                       | Biolegend                 | Cat#100453; RRID:AB_2565843     |
| Anti-mouse CD8a-BB515 (clone 53-6.7)                     | BD Biosciences            | Cat#564422; RRID:AB_2738801     |
| Anti-mouse CD8a-PE (clone 53-6.7)                        | Biolegend                 | Cat#100708; RRID:AB_312747      |
| Anti-mouse CD8a-BUV737 (clone 53-6.7)                    | BD Biosciences            | Cat#612759; RRID:AB_2870090     |
| Anti-mouse CD11b-alexafluor700 (clone M1/70)             | Biolegend                 | Cat#101222; RRID:AB_493705      |
| Anti-mouse Gr1-PE-Cy5.5 (clone RB6-8C5)                  | eBioscience               | Cat#35-5931-82; RRID:AB_469740  |
| Anti-mouse CD11c-PE/Dazzle594 (clone N418)               | Biolegend                 | Cat#117348; RRID:AB_2563655     |
| Anti-mouse MHCI (I-A/I-E)-FITC (clone M5/114.15.2)       | eBioscience               | Cat#11-5321-85; RRID:AB_465233  |
| Anti-mouse CD64-PE/Cy7 (clone X54-5/7.1)                 | Biolegend                 | Cat#139314; RRID:AB_2563904     |
| Anti-mouse CD169-PE/Cy7 (clone 3D6.112)                  | Biolegend                 | Cat#142412; RRID:AB_2563911     |
| Anti-mouse B220-BUV737 (clone RA3-6B2)                   | BD Biosciences            | Cat#612838; RRID:AB_2870160     |
| Anti-mouse IL6R-PE (clone D7715A7)                       | Biolegend                 | Cat#115806; RRID:AB_313677      |
| Anti-mouse gp130-PE (clone 4H1B35)                       | Biolegend                 | Cat#149403; RRID:AB_2566644     |
| Anti-mouse Foxp3-efluor450 (clone FJK-16s)               | eBioscience               | Cat#48-5773-82; RRID:AB_1518812 |
| Anti-mouse/human GzmB-Pacific blue (clone GB11)          | Biolegend                 | Cat#515408; RRID:AB_2562196     |
| Anti-mouse TNF-PE (clone MP6-XT22)                       | Biolegend                 | Cat#506306; RRID:AB_315427      |
| Anti-mouse IFN <sub>γ</sub> -PE/Dazzle594 (clone XMG1.2) | Biolegend                 | Cat#505846; RRID:AB_2563980     |
| Anti-mouse IL-17A-BV785 (clone C11-18H10)                | Biolegend                 | Cat#506928; RRID:AB_2629787     |
| Anti-human CD8a-BUV395 (clone RPA-T8)                    | BD Biosciences            | Cat#563796                      |
| Anti-human TNF-alexafluor488 (clone MAb11)               | Biolegend                 | Cat#502917; RRID:AB_493122      |
| Anti-human IFN <sub>γ</sub> -APC (clone B27)             | Biolegend                 | Cat#506510; RRID:AB_315443      |
| Anti-human CD3 (clone OKT3)                              | eBioscience               | Cat#16-0037-85; RRID:AB_468855  |
| Anti-human CD28 (clone CD28.2)                           | BD Biosciences            | Cat#555725; RRID:AB_396068      |

(Continued on next page)



**Continued**

| REAGENT or RESOURCE                                                                                                                    | SOURCE                   | IDENTIFIER                            |
|----------------------------------------------------------------------------------------------------------------------------------------|--------------------------|---------------------------------------|
| <b>Biological samples</b>                                                                                                              |                          |                                       |
| Pre-treatment PBMC from Atezolizumab trials (IMmotion150 and IMvigor210)                                                               | Genentech                | N/A                                   |
| Healthy donor PBMC                                                                                                                     | Genentech                | N/A                                   |
| Renal cell cancer tissue blocks from IMmotion150                                                                                       | Genentech                | N/A                                   |
| <b>Chemicals, peptides, and recombinant proteins</b>                                                                                   |                          |                                       |
| TrueCut Cas9 Protein v2                                                                                                                | Thermo Fisher Scientific | Cat#A36499                            |
| Recombinant mouse IL-6                                                                                                                 | R&D Systems              | Cat#406-ML                            |
| Recombinant mouse hyper-IL-6                                                                                                           | R&D Systems              | Cat# 9038-SR-025/CF                   |
| Recombinant human IL-6                                                                                                                 | R&D Systems              | Cat#206-IL                            |
| Recombinant human IL-2                                                                                                                 | R&D Systems              | Cat#202-IL                            |
| SIINFEKL (OVA 257-264) peptide                                                                                                         | AnaSpec                  | Cat#AS-60193-1                        |
| Fixable Viability Dye eFluor™ 780                                                                                                      | Invitrogen               | Cat#65-0865-14                        |
| Cell Stimulation Cocktail plus protein transport inhibitors (500X)                                                                     | Invitrogen               | Cat#00-4975-03                        |
| Brefeldin A (1000X)                                                                                                                    | eBioscience              | Cat#00-4506-51                        |
| <b>Critical commercial assays</b>                                                                                                      |                          |                                       |
| Foxp3/Transcription Factor Staining Buffer Set                                                                                         | eBioscience              | Cat#00-5523-00                        |
| EasySep Mouse CD8 <sup>+</sup> T cell Isolation Kit                                                                                    | StemCell Technologies    | Cat#19853                             |
| EasySep Mouse Naive CD8 <sup>+</sup> T cell Isolation Kit                                                                              | StemCell Technologies    | Cat#19858                             |
| EasySep Human Naive CD8 <sup>+</sup> T cell Isolation Kit                                                                              | StemCell Technologies    | Cat#19258                             |
| RNEasy Mini Kit                                                                                                                        | Qiagen                   | Cat#74104                             |
| iScript cDNA synthesis kit                                                                                                             | Biorad                   | Cat#1708891                           |
| <b>Deposited data</b>                                                                                                                  |                          |                                       |
| Raw and analyzed bulk RNAseq data (mouse)                                                                                              | This paper               | GEO: GSE199048                        |
| Tumor expression data (IMmotion150)                                                                                                    | EGA                      | EGA: EGAS00001004387                  |
| Human PBMC single-cell RNAseq count data                                                                                               | EGA                      | EGA: EGAS00001004451, EGAS00001004458 |
| <b>Experimental models: Cell lines</b>                                                                                                 |                          |                                       |
| EMT6                                                                                                                                   | Genentech                | N/A                                   |
| MC38                                                                                                                                   | Genentech                | N/A                                   |
| MC38-GFP                                                                                                                               | Genentech                | N/A                                   |
| CT26                                                                                                                                   | Genentech                | N/A                                   |
| EG7.OVA                                                                                                                                | Genentech                | N/A                                   |
| <b>Experimental models: Organisms/strains</b>                                                                                          |                          |                                       |
| Mouse: C57BL/6J                                                                                                                        | The Jackson Laboratory   | JAX: 000664                           |
| Mouse: BALB/c                                                                                                                          | Charles River            | Model# 028                            |
| Mouse: B6; SJL- <i>Il6ra</i> <sup>tm1.1Drew/J</sup>                                                                                    | The Jackson Laboratory   | JAX: 012944                           |
| Mouse: Rosa26-Cre.ki (C57BL/6NTac-Gt(ROSA)26Sor <sup>tm16(cre)Arte</sup> )                                                             | Taconic                  | Model# 12524                          |
| Mouse: <i>IL6R</i> <sup>-/-</sup> (B6; SJL- <i>Il6ra</i> <sup>tm1.1Drew/J</sup> x C57BL/6NTac-Gt(ROSA)26Sor <sup>tm16(cre)Arte</sup> ) | This paper               | N/A                                   |
| Mouse OT-1: C57BL/6 <sup>Tg(TcraTcrb)1100Mjb/J</sup>                                                                                   | The Jackson Laboratory   | JAX: 003831                           |
| Mouse: <i>IL6R</i> <sup>-/-</sup> OT-1 (C57BL/6 <sup>Tg(TcraTcrb)1100Mjb/J</sup> x C57BL/6 <sup>Il6r-/-</sup> )                        | This paper               | N/A                                   |
| Mouse: Cd4-Cre (B6.Cg-Tg(CD4-cre)1Cwi N9)                                                                                              | Taconic                  | Model# 4196                           |
| Mouse: <i>Stat3</i> <sup>fllox</sup> (B6.129S1- <i>Stat3</i> <sup>tm1Xyfu/J</sup> )                                                    | The Jackson Laboratory   | JAX: 016923                           |
| Mouse: CD4 <sup>ΔSTAT3</sup> (B6.Cg-Tg(CD4-cre)1Cwi N9 x B6.129S1- <i>Stat3</i> <sup>tm1Xyfu/J</sup> )                                 | This paper               | N/A                                   |

(Continued on next page)

**Continued**

| REAGENT or RESOURCE                                                                               | SOURCE                                  | IDENTIFIER                                                                                    |
|---------------------------------------------------------------------------------------------------|-----------------------------------------|-----------------------------------------------------------------------------------------------|
| Mouse: Cd8a-Cre (C57BL/6-Tg(Cd8a-cre)1Itan/J)                                                     | The Jackson Laboratory                  | JAX: 008766                                                                                   |
| Mouse: CD8 <sup>-iL6R</sup> (C57BL/6-Tg(Cd8a-cre)1Itan/J x B6; SJL-Il6ra <sup>tm1.1Drew</sup> /J) | This paper                              | N/A                                                                                           |
| <b>Oligonucleotides</b>                                                                           |                                         |                                                                                               |
| Rpl19 (Mm02601633_g1)                                                                             | Life Technologies                       | Cat#4331182                                                                                   |
| Il6ra (Mm01211445_m1)                                                                             | Life Technologies                       | Cat#4331182                                                                                   |
| Il6st (Mm00439665_m1)                                                                             | Life Technologies                       | Cat#4331182                                                                                   |
| Batf (Mm00479410_m1)                                                                              | Life Technologies                       | Cat#4331182                                                                                   |
| Guide targeting exon 1 of Batf<br>5' GGGGGTACCTGTTTCCAG-3'                                        | IDT                                     | N/A                                                                                           |
| Alt-R CRISPR-Cas9 tracrRNA                                                                        | IDT                                     | Cat#1072534                                                                                   |
| Alt-R CRISPR-Cas9 negative control crRNA                                                          | IDT                                     | Cat#1072544                                                                                   |
| IL6 in situ hybridization probe                                                                   | Advanced Cell Diagnostics               | Cat#2-1082                                                                                    |
| <b>Software and algorithms</b>                                                                    |                                         |                                                                                               |
| FlowJo                                                                                            | FlowJo                                  | <a href="https://www.flowjo.com/">https://www.flowjo.com/</a>                                 |
| Prism 9                                                                                           | GraphPad                                | <a href="https://www.graphpad.com/">https://www.graphpad.com/</a>                             |
| R                                                                                                 | The R Project for Statistical Computing | <a href="https://www.r-project.org/">https://www.r-project.org/</a>                           |
| Microsoft Excel for Mac                                                                           | Microsoft                               | <a href="https://products.office.com/en-us/excel">https://products.office.com/en-us/excel</a> |

**RESOURCE AVAILABILITY**

**Lead contact**

Further information and requests for resources and reagents should be directed to and will be fulfilled by the lead contact, Nathaniel West ([west.nathaniel@gene.com](mailto:west.nathaniel@gene.com)).

**Materials availability**

This study did not generate new unique reagents.

**Data and code availability**

- Qualified researchers may request access to individual patient-level data through the clinical study data request platform (<http://www.clinicalstudydatarequest.com>). Further details on Roche's criteria for eligible studies are available here (<https://clinicalstudydatarequest.com/Study-Sponsors/Study-Sponsors-Roche.aspx>). For further details on Roche's Global Policy on the Sharing of Clinical Information and how to request access to related clinical study documents, see here ([http://www.roche.com/research\\_and\\_development/who\\_we\\_are\\_how\\_we\\_work/clinical\\_trials/our\\_commitment\\_to\\_data\\_sharing.htm](http://www.roche.com/research_and_development/who_we_are_how_we_work/clinical_trials/our_commitment_to_data_sharing.htm)).
- Human tumor gene expression data for IMmotion150 are publicly available at the European Genome-Phenome Archive (EGA) under accession number EGA: EGAS00001004387 (Yuen et al., *Nature Medicine*, 2020).
- Raw counts of human PBMC scRNA-seq data analyzed in this study have been submitted to the EGA with accession numbers EGA: EGAS00001004451, EGAS00001004458.
- Raw and processed count matrix data from RNA-seq analysis of mouse T cells have been submitted to Gene Expression Omnibus as Super-Series GEO: GSE199048.
- This paper does not report original code.
- Any additional information required to reanalyze the data reported in this paper is available from the [lead contact](#) upon request.

**EXPERIMENTAL MODEL AND SUBJECT DETAILS**

**In vivo animal studies**

C57BL/6J (JAX stock #000664), BALB/c (Charles River), C57BL/6.OT-I (JAX stock #003831),<sup>65</sup> C57BL/6.Stat3<sup>fllox</sup> (JAX stock #016923),<sup>66</sup> C57BL/6.CD4-cre (Taconic stock #4196),<sup>67</sup> C57BL/6J.Il6ra<sup>fllox</sup> (JAX stock #012944),<sup>68</sup> and C57BL/6.E8i.Cd8a-cre (JAX stock #008766)<sup>69</sup> mice were bred and housed at Genentech under specific pathogen free (SPF) conditions. Whole-body IL6R.ko mice were generated by crossing C57BL/6J.Il6ra<sup>fllox</sup> and Rosa26-Cre.ki mice. Female mice were used for all studies and were

8–10 weeks old at the start of experiments. Experimental animals were housed at Genentech in standard rodent microisolator cages. Specific animal genotypes are indicated in figures or figure legends. For studies of transgenic mice, littermate controls were used where appropriate. All animal studies were approved by the Genentech Institutional Animal Care and Use Committee.

### Human clinical studies

Patient demographics for the clinical trials analyzed in this study are provided in [Tables S1](#), [S2](#), and [S3](#). All patients gave informed consent and studies were approved by their respective ethical review committees. For specific details of ethical review and study designs, see original publications for IMmotion150,<sup>11</sup> PCD4989g,<sup>13</sup> IMvigor210,<sup>14,15</sup> and IMvigor211.<sup>16</sup>

### Cell lines and primary cultures

The EMT6 murine mammary carcinoma (BALB/c), CT26 murine colon carcinoma (BALB/c), MC38 murine colon carcinoma (C57BL/6), and E.G7-OVA murine lymphoma (C57BL/6) cell lines were cultured in Roswell Park Memorial Institute (RPMI) 1640 medium plus 2 mM L-glutamine with 10% fetal bovine serum (FBS; Hyclone, Waltham, MA). Cell lines used in this study were negative for mycoplasma (based on Lonza Mycoalert and Stratagene Mycosensor assays) and authenticated by RNA-seq analysis. Sources of primary T cells used in *ex vivo* activation assays are specified in figure legends.

## METHOD DETAILS

### Clinical sample collection

Plasma samples from TNBC patients were collected from PCD4989g (NCT01375842), a single-arm Phase I study that evaluated the clinical activity of atezolizumab in patients with locally advanced or metastatic malignancies, including TNBC. Bladder cancer plasma samples were collected in IMvigor210, a single-arm Phase 2 study investigating atezolizumab in UC patients (NCT02951767, NCT02108652) and in the Phase 3 UC trial IMvigor211 (NCT02302807) in which patients were treated with either chemotherapy (taxane or vinflunine) or atezolizumab as a second-line or higher treatment. RCC plasma and tumor samples were collected from IMmotion150 (NCT01984242), a phase II multicenter, randomized, open-label study investigating activity of atezolizumab and atezolizumab + bevacizumab versus sunitinib in metastatic clear cell renal carcinoma. Specimens from RCC patients were acquired <12 months before study treatment.

### RNAseq profiling of tumor tissue

Whole-transcriptome profiles were generated using TruSeq RNA Access technology (Illumina). RNA-seq reads were first aligned to ribosomal RNA sequences to remove ribosomal reads. The remaining reads were aligned to the human reference genome (NCBI Build 38) using GSNAP version 2013-10-10 (Wu et al., 2016), allowing a maximum of two mismatches per 75 base sequence (parameters: '-M 2 -n 10 -B 2 -i 1 -N 1 -w 200000 -E 1 -pairmax-rma = 200000 -clip-overlap'). To quantify gene expression levels, the number of reads mapped to the exons of each RefSeq gene was calculated using the functionality provided by the R/Bioconductor package GenomicAlignments. The CD8<sup>+</sup> T cell gene expression signature (GES) was defined in a previous publication for RCC.<sup>11</sup>

### Plasma IL-6 assay

EDTA plasma samples were collected from patients and stored at  $-80^{\circ}\text{C}$ . Plasma IL-6 was evaluated by previously qualified immunoassays on the multi-analyte platform Simple Plex Ella.<sup>70</sup> The samples were diluted twofold in sample diluent and loaded onto the cartridge for data acquisition.

### PBMC isolation and scRNAseq analysis

PBMC from UC and RCC patients were isolated using 50 mL Leucosep<sup>TM</sup> tubes (Greiner Bio-One International, Germany) and Ficoll-Paque<sup>TM</sup> PLUS (GE Healthcare, Sweden). Whole blood drawn into sodium heparin blood collection tubes was diluted 3x with phosphate-buffered saline (PBS) without calcium or magnesium (Lonza, Walkersville, Maryland). Diluted cell suspensions were layered on Leucosep tubes and centrifuged for 15 min at 800 x g at room temperature (RT). Interphases containing PBMCs were harvested, washed with PBS, and centrifuged for 10 min at 250 g at RT before further processing. PBMC were processed for scRNAseq analysis using the 10x Genomics platform (10x Genomics, Pleasanton, CA). Sample processing for single-cell RNA-seq was done using Chromium Single Cell 3' Library and Gel bead kit v2 (PN-120237) following manufacturer's user guide (CG00052, 10x Genomics, Pleasanton, CA). cDNA and libraries were prepared following manufacturer's user guide (10x Genomics). cDNA amplification and indexed libraries were prepared using 12 and 14 cycles of PCR, respectively. Libraries were profiled, quantified, and sequenced as described above (5' single-cell gene expression libraries).

Seurat (version 3.0) was used to perform basic quality control on the raw 50 GEX matrices output from Cell Ranger 2.2.0. The Cell Ranger Single Cell Software Suite v.2.2.1 was used to perform sample de-multiplexing, alignment, filtering, and UMI (i.e., universal molecular identifier) counting (<https://support.10xgenomics.com/single-cell-gene-expression/software/pipelines/latest/what-is-cell-ranger>). The data for each respective subpopulation were aggregated for direct comparison of single cell transcriptomes. Then, gene dispersion analysis implemented in Seurat was used to select highly variable genes, preserving genes with logarithmic mean expression between 0.0 and 3.0 and with logarithmic dispersion less than 0.5. Seurat (version 3.0) was used to analyze the

PBMC GEX data. Genes with detected expression in at least five cells, and cells with at least ten genes detected were used. The first 20 principal components were used for clustering (resolution = 0.6) and for UMAP visualization. Clusters were identified based on genes that are enriched in a specific cluster. Immunophenotyping of PBMCs was inferred from the annotation of cluster-specific genes; Total T cells (*CD3D*, *CD3E*), CD8<sup>+</sup> T cells (*CD3E*, *CD8A*, *CD8B*), B cells (*CD79A*), CD14 monocytes (*CD14*), and NK cells (*NKG7*-positive and *CD3E*-negative).

Differential gene expression analysis of CD8<sup>+</sup> T cells from IL-6-high (plasma IL-6 >10 pg/mL) versus IL-6-low patients used raw counts of the samples and was performed by edgeR in R (version 2.13.0) using the generalized linear model workflow described in the edgeR manual. First, the sequencing reads for duplicate sequencing libraries were combined to produce a single set of sequencing reads for each sample, and the raw read counts for each gene were used to produce a DGEList object in edgeR. Genes were only included if they were represented by at least one read in all of the samples. The `calcNormFactors()` function was used to account for differences in the library size for each sample, and an experimental design model consisting of the batch and HS status was established. The functions `estimateCommonDisp()` and `estimateTagwiseDisp()` were used to estimate dispersion. Following this, differential expression was tested using the exact test based on qCML methods. The Benjamini-Hochberg correction was used with a false discovery cut-off of 0.05. Reactome pathway enrichment analysis was used to identify processes associated with differentially expressed genes.<sup>71</sup>

### Software versions related to clinical data analysis

Computational analysis was performed using Cell Ranger software (10x Genomics, Pleasanton, CA) version 2.2.0, Perl version 5.18.4, R version 3.6.0, and the following packages and versions in R for analysis: Seurat, 3.0.0; edgeR, 3.26.0; cluster, 2.0.8; dynamicTreeCut, 1.63-1; UMAP, WGCNA, 1.66; and survival, 2.42-6. Figures and tables were generated using the following packages and versions in R: RColorBrewer, 1.1-2; ggplot2, 3.1.1; gridExtra, 2.3; ComplexHeatmap, 2.0.0; superheat, 1.0.0; colorspace, 1.3-2; dplyr, 0.7.8; and data for external datasets were obtained using GenomicDataCommons, 1.4.3; GEOquery, 2.48.0. The above R packages depended secondarily on the following support packages: Matrix, 1.2-17; Biobase, 2.40.0; BiocGenerics, 0.26.0; cowplot, 0.9.3; DDRtree, 0.1.5; edgeR, 2.13.0; irlba, 2.3.2; limma, 3.38.2; magrittr, 1.5; Matrix, 1.2-15; ranger, 0.10.1; and VGAM, 1.0-6.

### IL6 *in situ* hybridization

For the detection of *IL6* mRNA expression in RCC tumors, *in situ* hybridization was performed on 4 $\mu$ m thick formalin-fixed, paraffin-embedded tissue sections mounted on glass slides. The process was automated on the Leica BOND Rx platform (Buffalo Grove, IL). A 20 base-pair probe to the target region of *IL6* (2-1082) was used (Advanced Cell Diagnostics, Inc., Newark, CA). Tissue sections were pre-treated with heat and protease before hybridization with oligonucleotide probes. Detection and amplification were performed with the RNAscope 2.5 LSx Reagent Kit in Red (Advanced Cell Diagnostics, Inc., Newark, CA). Tumor sections were analyzed by a qualified pathologist and considered *IL6* positive if at least 1% of either tumor cell area or stromal area showed *IL6* stain. Epithelial and stromal cells were distinguished based on a combination of features and also evaluation of an adjacent, hematoxylin/eosin-stained section. Tumor cells in Figure 1D are characterized by larger nuclei with variable shape and outline and a more "open" chromatin pattern. Stromal cells show smaller and condensed nuclei. Tumor cells also have more abundant cytoplasm compared to stromal cells and show a more cohesive growth pattern of trabecular or acinar shapes.

### *In vivo* tumor studies

Tumor cell lines in log-phase growth were centrifuged, washed with Hank's balanced salt solution (HBSS), counted, and resuspended in 50% HBSS and 50% Matrigel (BD Biosciences; San Jose, CA). EMT6 cells were inoculated in the left #5 mammary fat pad ( $1 \times 10^5$  cells in 100  $\mu$ L of HBSS/Matrigel mixture). Mice were inoculated subcutaneously in the right flank with  $1 \times 10^5$  CT26 cells,  $1 \times 10^6$  MC38 cells, or  $2 \times 10^6$  E.G7-OVA cells in 100  $\mu$ L of HBSS/Matrigel mixture. When tumors reached a volume of 130–230 mm<sup>3</sup> (approximately 8 days after inoculation), animals were distributed into treatment groups such that variance in tumor sizes between treatment groups was minimized. Mice were treated with isotype control antibodies, anti-PD-L1 (mouse IgG1 clone 6E11, 10 mg/kg first dose followed by 5 mg/kg thereafter), anti-IL6R (mouse IgG2a clone MR16-1, 15 mg/kg), or a combination of anti-PD-L1 and anti-IL6R. Anti-PD-L1, anti-IL6R, and isotype control antibodies were produced in-house and were free of endotoxin contamination. For EMT6, CT26, and MC38 studies, mice were euthanized after 10–11 days (after 3 doses of treatment) and tumors collected for flow cytometry analysis. For E.G7-OVA studies, tumors were evaluated one week after adoptive transfer of  $1 \times 10^6$  OT-I CD8<sup>+</sup> T cells. For therapeutic efficacy studies, antibodies were administered 2 times per week for 3 weeks (intravenously for the first dose and intraperitoneally thereafter). Tumors were measured 2 times per week using digital calipers, and tumor volumes calculated using the modified ellipsoid formula,  $1/2 \times (\text{length} \times \text{width}^2)$ . When tumor volumes fell below 32 mm<sup>3</sup> (lower limit of detection) they were considered a complete response (CR; 100% tumor growth inhibition). Tumors that regressed to less than 50% of starting volume but eventually recurred were considered partial responders (PR), and tumors that never regressed were considered to be progressive disease (PD). Disease progression was defined as a 5x increase in tumor volume. Mice were euthanized if tumors ulcerated or volumes exceeded 2000 mm<sup>3</sup>. Early euthanasia of some mice due to tumor ulceration contributed to some variability in final sample sizes of immune pharmacodynamic studies. No mice met criteria for euthanasia due to body weight loss or adverse clinical signs.

### DEC-OVA immunization

Naive OT-I T cells were isolated from spleens and lymph nodes of OT-I or OT-I.IL6R.ko mice (both CD90.1+) by first mashing through 70  $\mu\text{m}$  pore filters using the sterile blunt end of a plunger from a 1 mL syringe. Naive CD8<sup>+</sup> T cells were then isolated using the EasySep Mouse Naive CD8<sup>+</sup> T cell Isolation Kit (STEMCELL Technologies, Cambridge, MA). Cells were resuspended at  $1 \times 10^7$  cells/mL in sterile HBSS and  $1 \times 10^6$  cells (0.1 mL) were injected intravenously via the lateral tail vein into wild type C57BL/6J (CD90.2) recipient mice bearing EG.7-OVA tumors. The next day mice were injected intravenously with a mixture of 50  $\mu\text{g}/\text{kg}$  DEC-OVA (ovalbumin fused to anti-DEC205 antibody; produced in-house) and 2.5 mg/kg anti-CD40 antibody (produced in-house; clone FGK4.5).

### EMT6 cell proliferation *in vitro*

EMT6 cell responsiveness to IL-6 (10 ng/mL) and hyper-IL-6 (20 ng/mL) was quantified using a p-STAT3 (Y705) electrochemiluminescence assay after 15 min of stimulation (Meso Scale Diagnostics, Rockville, MD). Cell proliferation in the presence or absence of hyper-IL-6 (20 ng/mL) or anti-IL6R antibody (40  $\mu\text{g}/\text{mL}$ ) was determined by seeding cells into flat-bottom 96-well plates and tracking confluence over time using InCuCyte live-cell imaging (Essen BioScience, Ann Arbor, MI).

### Tissue preparation and flow cytometry

Tumors were weighed, minced, and enzymatically digested using a cocktail of dispase (Life Technologies, Carlsbad, CA), collagenase P, and DNaseI (Roche, Penzberg, Germany) for 45 min at 37°C to obtain a single-cell suspension. Cells were counted using a Vi-CELL XR (Beckman Coulter, Brea, CA). Cell suspensions were passed through 100  $\mu\text{m}$  pore filters to remove clumps and debris. For analysis of cytokine expression, cells were re-stimulated *ex vivo* for 3 h at 37°C in T cell stimulation media composed as follows: RPMI 1640 medium with 10% FBS (Hyclone, Waltham, MA), 100 U/mL penicillin/100  $\mu\text{g}/\text{mL}$  streptomycin (Gibco, Thermo Fisher Scientific, Waltham, MA), 55  $\mu\text{M}$   $\beta$ -mercaptoethanol (Gibco, Thermo Fisher Scientific, Waltham, MA), 2 mM L-glutamine (Gibco, Thermo Fisher Scientific, Waltham, MA), 1 mM sodium pyruvate (Gibco, Thermo Fisher Scientific, Waltham, MA), 0.1 mM non-essential amino acids (Gibco, Thermo Fisher Scientific, Waltham, MA), 10 mM HEPES (Gibco, Thermo Fisher Scientific, Waltham, MA), and 1x Cell Stimulation Cocktail with protein transport inhibitors (containing phorbol 12-myristate 13-acetate (PMA), ionomycin, brefeldin A, and monensin; eBioscience, Thermo Fisher Scientific, Waltham, MA). For cell staining, cells were first incubated with anti-CD16/CD32 Fc block (5  $\mu\text{g}/\text{mL}$ ; BD Biosciences, San Jose, CA; clone 2.4G2) and LIVE/DEAD Fixable dead cell stain (eFluor780; Invitrogen, Carlsbad, CA) in PBS for 20 min at 4–8°C. Cells were then washed and stained with combinations of the following antibodies: CD45-BV510 (2  $\mu\text{g}/\text{mL}$ ; BD Biosciences, San Jose, CA; clone 30-F11), Thy1.2-eFluor450 (2  $\mu\text{g}/\text{mL}$ ; eBioscience, Thermo Fisher Scientific, Waltham, MA; clone 53-2.1), Thy1.2-alexafluor700 (5  $\mu\text{g}/\text{mL}$ ; BioLegend, San Diego, CA; clone 53-2.1), Thy1.1-alexafluor488 (2.5  $\mu\text{g}/\text{mL}$ ; BioLegend, San Diego, CA; clone OX-7), CD3 $\epsilon$ -PE/Cy5.5 (2  $\mu\text{g}/\text{mL}$ ; eBioscience, Thermo Fisher Scientific, Waltham, MA; clone 145-2C11), CD4-BUV395 (2  $\mu\text{g}/\text{mL}$ ; BD Biosciences, San Jose, CA; clone GK1.5), CD4-BV785 (2  $\mu\text{g}/\text{mL}$ ; BioLegend, San Diego, CA; clone GK1.5), CD8a-BB515 (2  $\mu\text{g}/\text{mL}$ ; BD Biosciences, San Jose, CA; clone 53-6.7), CD8a-PE (2  $\mu\text{g}/\text{mL}$ ; BioLegend, San Diego, CA; clone 53-6.7), CD8a-BUV737 (2  $\mu\text{g}/\text{mL}$ ; BD Biosciences, San Jose, CA; clone 53-6.7), CD11b-alexafluor700 (5  $\mu\text{g}/\text{mL}$ ; BioLegend, San Diego, CA; clone M1/70), Gr1-PE-Cy5.5 (1  $\mu\text{g}/\text{mL}$ ; eBioscience, Thermo Fisher Scientific, Waltham, MA; clone RB6-8C5), CD11c-PE/Dazzle594 (2  $\mu\text{g}/\text{mL}$ ; BioLegend, San Diego, CA; clone N418), MHCII (I-A/I-E)-FITC (2.5  $\mu\text{g}/\text{mL}$ ; eBioscience, Thermo Fisher Scientific, Waltham, MA; clone M5/114.15.2), CD64-PE/Cy7 (2  $\mu\text{g}/\text{mL}$ ; BioLegend, San Diego, CA; clone X54-5/7.1), CD169-PE/Cy7 (2  $\mu\text{g}/\text{mL}$ ; BioLegend, San Diego, CA; clone 3D6.112), B220-BUV737 (2  $\mu\text{g}/\text{mL}$ ; BD Biosciences, San Jose, CA; clone RA3-6B2), IL6R-PE (2  $\mu\text{g}/\text{mL}$ ; BioLegend, San Diego, CA; clone D7715A7), and gp130-PE (2  $\mu\text{g}/\text{mL}$ ; BioLegend, San Diego, CA). Cells were stained for 20 min at 4–8°C.

Staining patterns used to define cell subsets were as follows: CD8<sup>+</sup> T cells, Thy1<sup>+</sup> CD3 $\epsilon$ <sup>+</sup> CD8a<sup>+</sup> CD4<sup>-</sup> CD11b<sup>-</sup>; CD4<sup>+</sup> Tconv cells, Thy1<sup>+</sup> CD3 $\epsilon$ <sup>+</sup> CD8a<sup>-</sup> CD4<sup>+</sup> Foxp3<sup>-</sup> CD11b<sup>-</sup>; Treg, Thy1<sup>+</sup> CD3 $\epsilon$ <sup>+</sup> CD8a<sup>-</sup> CD4<sup>+</sup> Foxp3<sup>+</sup> CD11b<sup>-</sup>; macrophages, CD11b<sup>+</sup> CD64<sup>+</sup> Gr1<sup>-</sup>; monocytes/Mo-MDSC, CD11b<sup>+</sup> Gr1<sup>int</sup> CD64<sup>int</sup>; neutrophils/Gr-MDSC, CD11b<sup>+</sup> Gr1<sup>high</sup> CD64<sup>-</sup>; B cells, Thy1<sup>-</sup> CD11b<sup>-</sup> B220<sup>+</sup> MHCII<sup>+</sup> CD4<sup>-</sup>; plasmacytoid DC, Thy1<sup>-</sup> CD11b<sup>-</sup> B220<sup>+</sup> MHCII<sup>int</sup> CD4<sup>+</sup> CD11c<sup>+</sup>; classical DC1, Thy1<sup>-</sup> B220<sup>-</sup> CD64/CD169<sup>-</sup> CD11c<sup>+</sup> MHCII<sup>+</sup> CD11b<sup>-</sup> CD8a<sup>+</sup>; classical DC2, Thy1<sup>-</sup> B220<sup>-</sup> CD64/CD169<sup>-</sup> CD11c<sup>+</sup> MHCII<sup>+</sup> CD11b<sup>+</sup> CD8a<sup>-</sup>.

For analysis of intracellular proteins, surface-stained cells were fixed and permeabilized with the eBioscience Foxp3/Transcription Factor staining buffer set (Thermo Fisher Scientific, Waltham, MA). Cells were then stained for 30–60 min at 4–8°C with combinations of the following antibodies in 1x permeabilization buffer: Foxp3-eFluor450 (2  $\mu\text{g}/\text{mL}$ ; eBioscience, Thermo Fisher Scientific, Waltham, MA; clone FJK-16s), GzmB-Pacific Blue (1  $\mu\text{g}/\text{mL}$ ; BioLegend, San Diego, CA; clone GB11), TNF-PE (1  $\mu\text{g}/\text{mL}$ ; BioLegend, San Diego, CA; clone MP6-XT22), IFN $\gamma$ -PE/Dazzle594 (0.67  $\mu\text{g}/\text{mL}$ ; BioLegend, San Diego, CA; clone XMG1.2), and IL-17A-BV785 (1  $\mu\text{g}/\text{mL}$ ; BioLegend, San Diego, CA; clone TC11-18H10).

Flow cytometry data were collected with a BD LSRFortessa or BD FACSymphony analyzer (BD Biosciences, San Jose, CA) and analyzed using FlowJo software (Version 10.5, FlowJo LLC, Ashland, OR). Cell sorting was performed on a BD Fusion/S6 (BD Biosciences, San Jose, CA).

### T cell activation *ex vivo*

Mouse spleens and/or lymph nodes were isolated and mashed through 70  $\mu\text{m}$  pore filters. For standard peptide activation of OT-I CD8<sup>+</sup> T cells, 0.2 million splenocytes were seeded in Falcon flat bottom 96 well plates (Corning Life Sciences, Corning, NY) and pulsed with 100 ng/mL SIINFEKL peptide (AnaSpec, Fremont, CA), allowing splenic antigen-presenting cells to present both peptide



and PD-L1 to T cells. After 2 days, cells were analyzed or transitioned to T cell media (without SIINFEKL) containing 10 ng/mL recombinant human IL-2 and incubated for 3–4 days before use in cytotoxicity assays or re-stimulation with anti-CD3/CD28 antibodies. For flow cytometry analysis of cytokine expression, Brefeldin A (eBioscience, Thermo Fisher Scientific, Waltham, MA) was added 4 h before staining.

For polyclonal T cell activation, bulk splenocytes or CD8<sup>+</sup> T cells isolated using the EasySep CD8<sup>+</sup> T cell Isolation Kit (STEMCELL Technologies, Cambridge, MA) were plated in T cell media containing 10 ng/mL human IL-2 at 0.2 million cells per well in Falcon flat bottom 96 well plates (Corning Life Sciences, Corning, NY) coated overnight with 5 μg/mL anti-CD3 antibody (BD Biosciences, San Jose, CA, clone 145-2C11) and 2.5 μg/mL anti-CD28 antibody (BD Biosciences, San Jose, CA, clone 37.51). Cells were labeled in some experiments with Cell Trace Violet-421 (Molecular Probes, Thermo Fisher Scientific, Waltham, MA). In some assays, T cells were activated in the presence of recombinant mouse IL-6 (10 ng/mL; R&D Systems, Minneapolis, MN), mouse hyper-IL-6 (20 ng/mL; R&D Systems, Minneapolis, MN), isotype control mouse IgG2a antibody (5 μg/mL), mouse IgG2a anti-IL6R antibody (5 μg/mL; clone MR16-1), or mouse IgG1 anti-PD-L1 (5 μg/mL; clone 6E11). CRISPR/Cas9-mediated deletion of *Batf* in primary T cells was performed according to a previously published protocol<sup>72</sup> using the following gRNA targeting exon 1 (GGGGGTACCTGTTGCCAG; IDT, San Diego, CA). BATF was detected in western blots using anti-BATF clone D7C5 (Cell Signaling Technology, Danvers, MA).

For human T cell activation, naive human CD8<sup>+</sup> T cells were isolated from buffy coats using the EasySep Human Naive CD8<sup>+</sup> T cell Isolation Kit (STEMCELL Technologies, Cambridge, MA), and plated on 96-well flat-bottom plates pre-coated with 10 μg/mL anti-CD3 (clone OKT3, Thermo Fisher Scientific, Waltham, MA) in T cell medium containing 1 μg/mL soluble anti-CD28 (clone CD28.2, BD Biosciences, San Jose, CA) and 10 ng/mL recombinant human IL-2 (R&D Systems, Minneapolis, MN). Recombinant human IL-6 (R&D Systems, Minneapolis, MN) was added to some wells at 10 ng/mL. Cells were re-stimulated with PMA/ionomycin before analysis.

### T cell cytotoxicity assays

OT-I CD8<sup>+</sup> T cells were activated with SIINFEKL peptide (AnaSpec, Fremont, CA) as described above in the presence or absence of recombinant mouse IL-6 (10 ng/mL) or hyper-IL-6 (20 ng/mL) for 5–6 days. MC38-GFP cells (plated at 5,000 cells per well in 96-well flat-bottom plates) were pulsed with 10 ng/mL SIINFEKL peptide for 1 h at 37°C and washed with PBS, at which time T cells were added in complete T cell medium. MC38 cell death was quantified over time using IncuCyte Live Cell Analysis (Essen Bioscience, Ann Arbor, MI).

### Bulk RNA-seq analysis of mouse T cells

OT-I CD8<sup>+</sup> T cells were activated with SIINFEKL peptide as described above. Viable CD8<sup>+</sup> T cells were sorted to >99% purity on day 7 using a BD FACS Aria Fusion cell sorter (BD Biosciences, San Jose, CA). RNA was extracted using the RNEasy mini kit (Qiagen, Germantown, MD). 0.1 μg of total RNA was used for library preparation using TruSeq Stranded Total RNA Library Prep Kit (Illumina, San Diego, CA). Libraries were multiplexed and sequenced on Illumina HiSeq4000 (Illumina, San Diego, CA) to generate 30 million single-end 50 base pair reads. Data were analyzed using HTSeqGenie in BioConductor as follows: first, reads with low nucleotide qualities (70% of bases with quality <23) or rRNA and adapter contamination were removed. The reads that passed were then aligned to the reference genome GRCh38.p10 using GSNAP (Wu et al., 2016). Alignments of the reads that were reported by GSNAP as “uniquely mapping” were used for subsequent analysis. Gene expression levels were quantified as Reads Per Kilobase of exon model per Million mapped reads normalized by size factor (nRPKM), defined as number of reads aligning to a gene in a sample/(total number of uniquely mapped reads for that sample x gene length x size factor). Principal components analysis (PCA) and generation of differential expression heatmaps were performed using Partek Flow version 8.0.19.0710. Differential gene expression analysis was performed using voom from the limma R package.<sup>73</sup>

### RNA extraction and qRT-PCR

Cells were lysed in RLT buffer and homogenized by pipetting. RNA was isolated using RNEasy Mini or Micro kits (Qiagen, Germantown, MD) followed by reverse transcription using the iScript cDNA synthesis kit (Biorad, Hercules, CA). Quantitative RT–qPCR was performed using Taqman assays (Life Technologies, Carlsbad, CA) according to manufacturer instructions and a ViiA7 384-well real-time PCR detection system (Applied Biosystems, Waltham, MA). All expression levels were normalized to an internal housekeeping gene (*Rpl19*) and calculated as  $2^{-\Delta\text{CTHK}-\text{CTgene}}$ .

### Western blotting

Cell pellets were lysed in RIPA buffer with protease and phosphatase inhibitors (Roche, Penzberg, Germany) at 4°C for 20 min. Supernatants were obtained after high-speed centrifugation and protein concentration measured using the BCA assay (Thermo Fisher Scientific, Waltham, MA). Lysates were denatured with reducing sample buffer and dithiothreitol (Invitrogen, Waltham, MA) at 95°C for 10 min. Proteins were separated by sodium dodecyl sulphate-polyacrylamide gel electrophoresis in a NuPAGE 4–12% gradient Bis-Tris gel and analyzed by western blotting with antibodies against phospho-STAT3 (clone D3A7, Cell Signaling Technology, Danvers, MA), total STAT3 (clone D1B2J, Cell Signaling Technology), BATF (clone D7C5, Cell Signaling Technology), and β-actin-HRP (Sigma-Aldrich, St Louis, MO).

## QUANTIFICATION AND STATISTICAL ANALYSIS

The Kaplan-Meier method was used to estimate the probability of OS. For OS analysis, surviving patients were censored at the time of the last contact. The hazard ratios and 95% confidence intervals for OS were estimated by a Cox regression model. Cox proportional hazards and linear regression model was performed to conduct multivariate analysis (co-variables are specified in figure legends).

Statistical calculations were performed using GraphPad software or R. Statistical details for specific experiments including the tests used and value/definition of  $n$  are provided in figure legends. Box-and-whisker plots represent median, quartiles, and maximum/minimum values. Bar charts and error bars indicate means and SEM. *In vitro* assays were performed with 3–4 technical replicates per condition. Sample sizes for *in vivo* mouse studies were based on the number of mice routinely needed to establish statistical significance based on variability within study arms. Each data point represents either a technical replicate (in the case of *in vitro* studies) or a biological replicate (individual mouse from *in vivo* studies). p-values and FDR values < 0.05 were considered in all analyses to be statistically significant.

## ADDITIONAL RESOURCES

Clinical trial information for IMmotion150 (NCT01984242): <https://clinicaltrials.gov/ct2/show/NCT01984242>.

Clinical trial information for PCD4989g (NCT01375842): <https://www.clinicaltrials.gov/ct2/show/NCT01375842>.

Clinical trial information for IMvigor210 (NCT02951767 and NCT02108652): <https://clinicaltrials.gov/ct2/show/NCT02951767> and <https://clinicaltrials.gov/ct2/show/NCT02108652>.

Clinical trial information for IMvigor211 (NCT02302807): <https://clinicaltrials.gov/ct2/show/NCT02302807>.

**Supplemental information**

**CD8<sup>+</sup> T cell-intrinsic IL-6 signaling promotes  
resistance to anti-PD-L1 immunotherapy**

**Mahrukh A. Huseni, Lifen Wang, Joanna E. Klementowicz, Kobe Yuen, Beatrice Breart, Christine Orr, Li-fen Liu, Yijin Li, Vinita Gupta, Congfen Li, Deepali Rishipathak, Jing Peng, Yasin Şenbabaoğlu, Zora Modrusan, Shilpa Keerthivasan, Shravan Madireddi, Ying-Jiun Chen, Eleanor J. Fraser, Ning Leng, Habib Hamidi, Hartmut Koeppen, James Ziai, Kenji Hashimoto, Marcella Fassò, Patrick Williams, David F. McDermott, Jonathan E. Rosenberg, Thomas Powles, Leisha A. Emens, Priti S. Hegde, Ira Mellman, Shannon J. Turley, Mark S. Wilson, Sanjeev Mariathan, Luciana Molinero, Mark Merchant, and Nathaniel R. West**

# Supplementary Figure 1

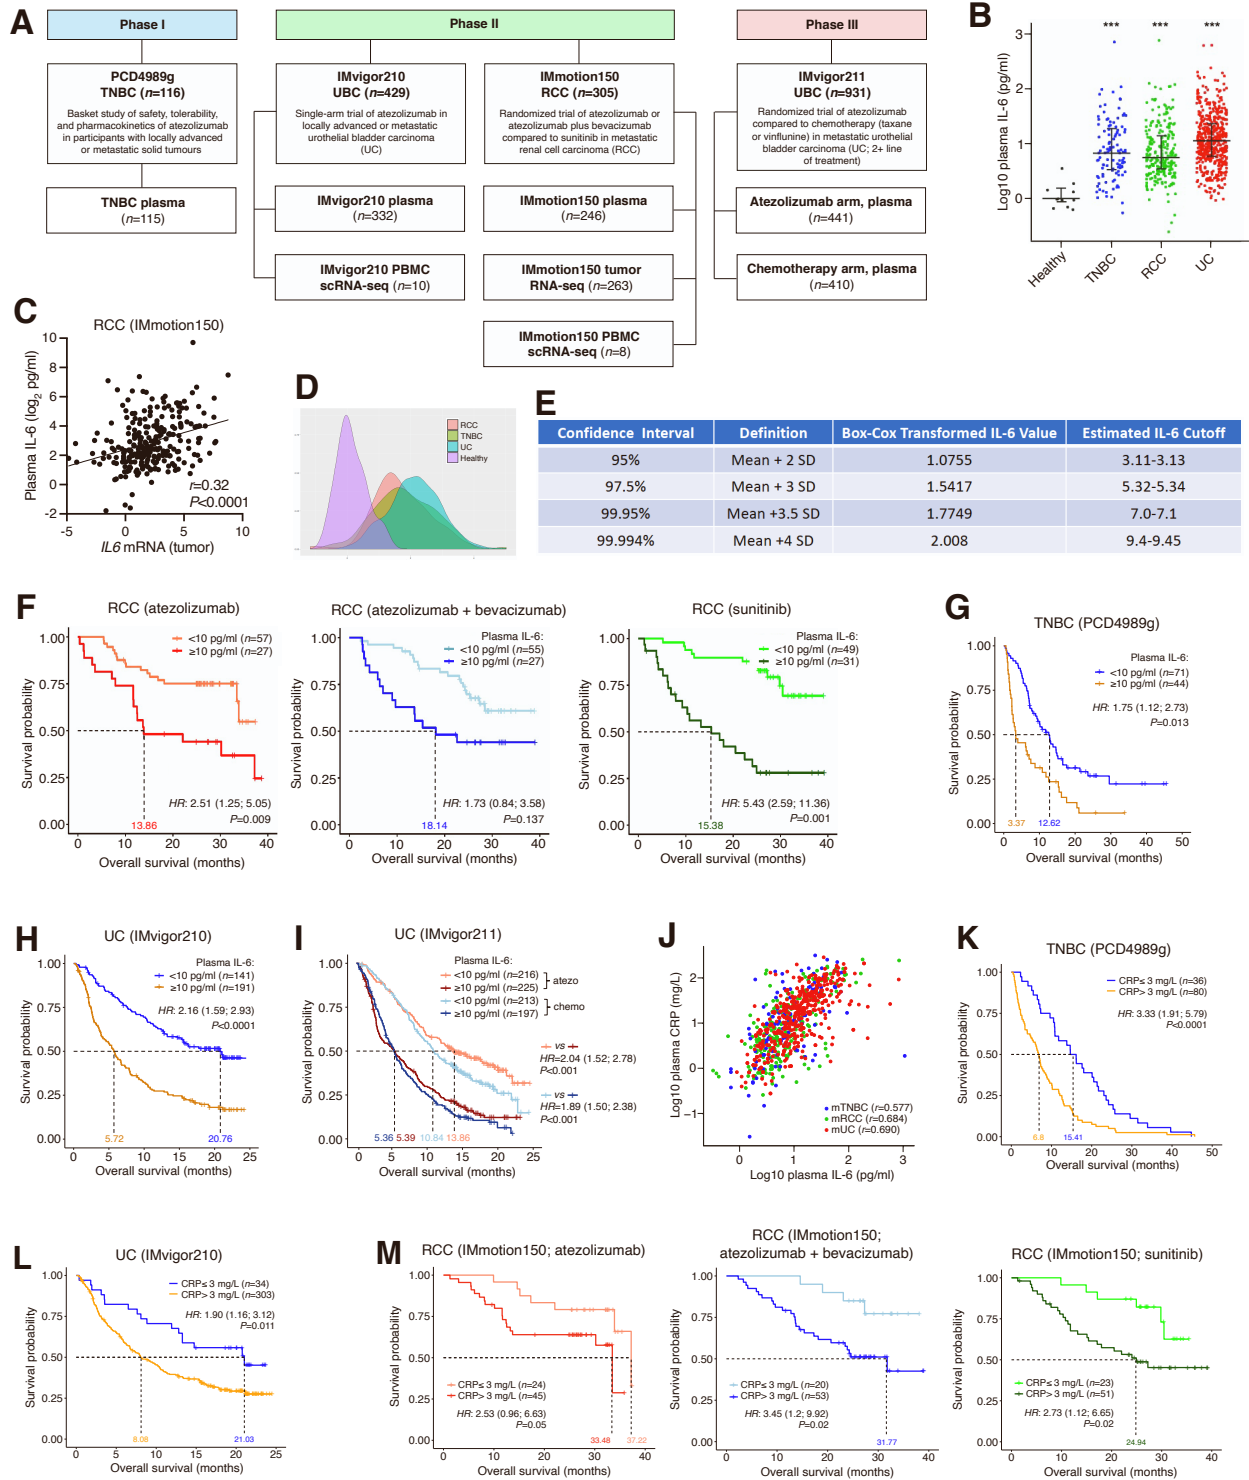

Legend on following page

**Supplementary Figure 1. Plasma IL-6 and CRP associate with poor response to atezolizumab (anti-PD-L1) in multiple human cancers (related to Figure 1).**

(A) Flowchart showing number of intent-to-treat patients in PCD4989g (TNBC cohort), IMvigor210, IMvigor211, and IMmotion150, as well as the numbers of patients whose plasma, bulk tumor RNAseq, or PBMC single-cell RNAseq samples were included for analysis.

(B) Plasma IL-6 concentrations in healthy individuals compared to patients with TNBC ( $P=1.87 \times 10^{-6}$ ), RCC ( $P=4.93 \times 10^{-7}$ ), or UC ( $P=1.35 \times 10^{-7}$ ), compared using two-sided Mann-Whitney *U*-tests with Benjamini-Hochberg correction.

(C) Pearson correlation of patient-matched tumor *IL6* mRNA expression (derived from RNAseq) and plasma IL-6 protein concentration in patients from IMmotion150.

(D) Distribution of plasma IL-6 in healthy adults and patients with the indicated cancer types.

(E) Plasma IL-6 concentrations were transformed into normality using Box-Cox transformation, and values were derived at the stated standard deviations and confidence intervals relative to the plasma IL-6 distribution of healthy adults. A concentration of  $\geq 10$  pg/ml ( $>4$  standard deviations from the healthy control mean) was chosen for downstream analyses as the definition of high plasma IL-6.

(F–I) Association of high plasma IL-6 with poor OS in IMmotion150 (F), the TNBC cohort of PCD4989g (G), IMvigor210 (H) and IMvigor211 (I).

(J) Pearson correlation of plasma IL-6 and plasma CRP in patients with TNBC, UC, or RCC.

(K–M) Association of high plasma CRP ( $>3$  mg/L) with poor OS in the TNBC cohort of PCD4989g (K), IMvigor210 (L), and IMmotion150 (M).

In all survival analyses, *HR* ( $\pm$  95% CI) and *P*-values were corrected in multivariate analysis using the following co-variates: ECOG (Eastern Cooperative Oncology Group) performance status, liver metastasis, and line of therapy for TNBC; ECOG performance status and presence of liver metastasis for UC; and MSKCC (Memorial Sloan Kettering Cancer Centre) prognostic risk score, previous nephrectomy, and liver metastasis for RCC.



# Supplementary Figure 2

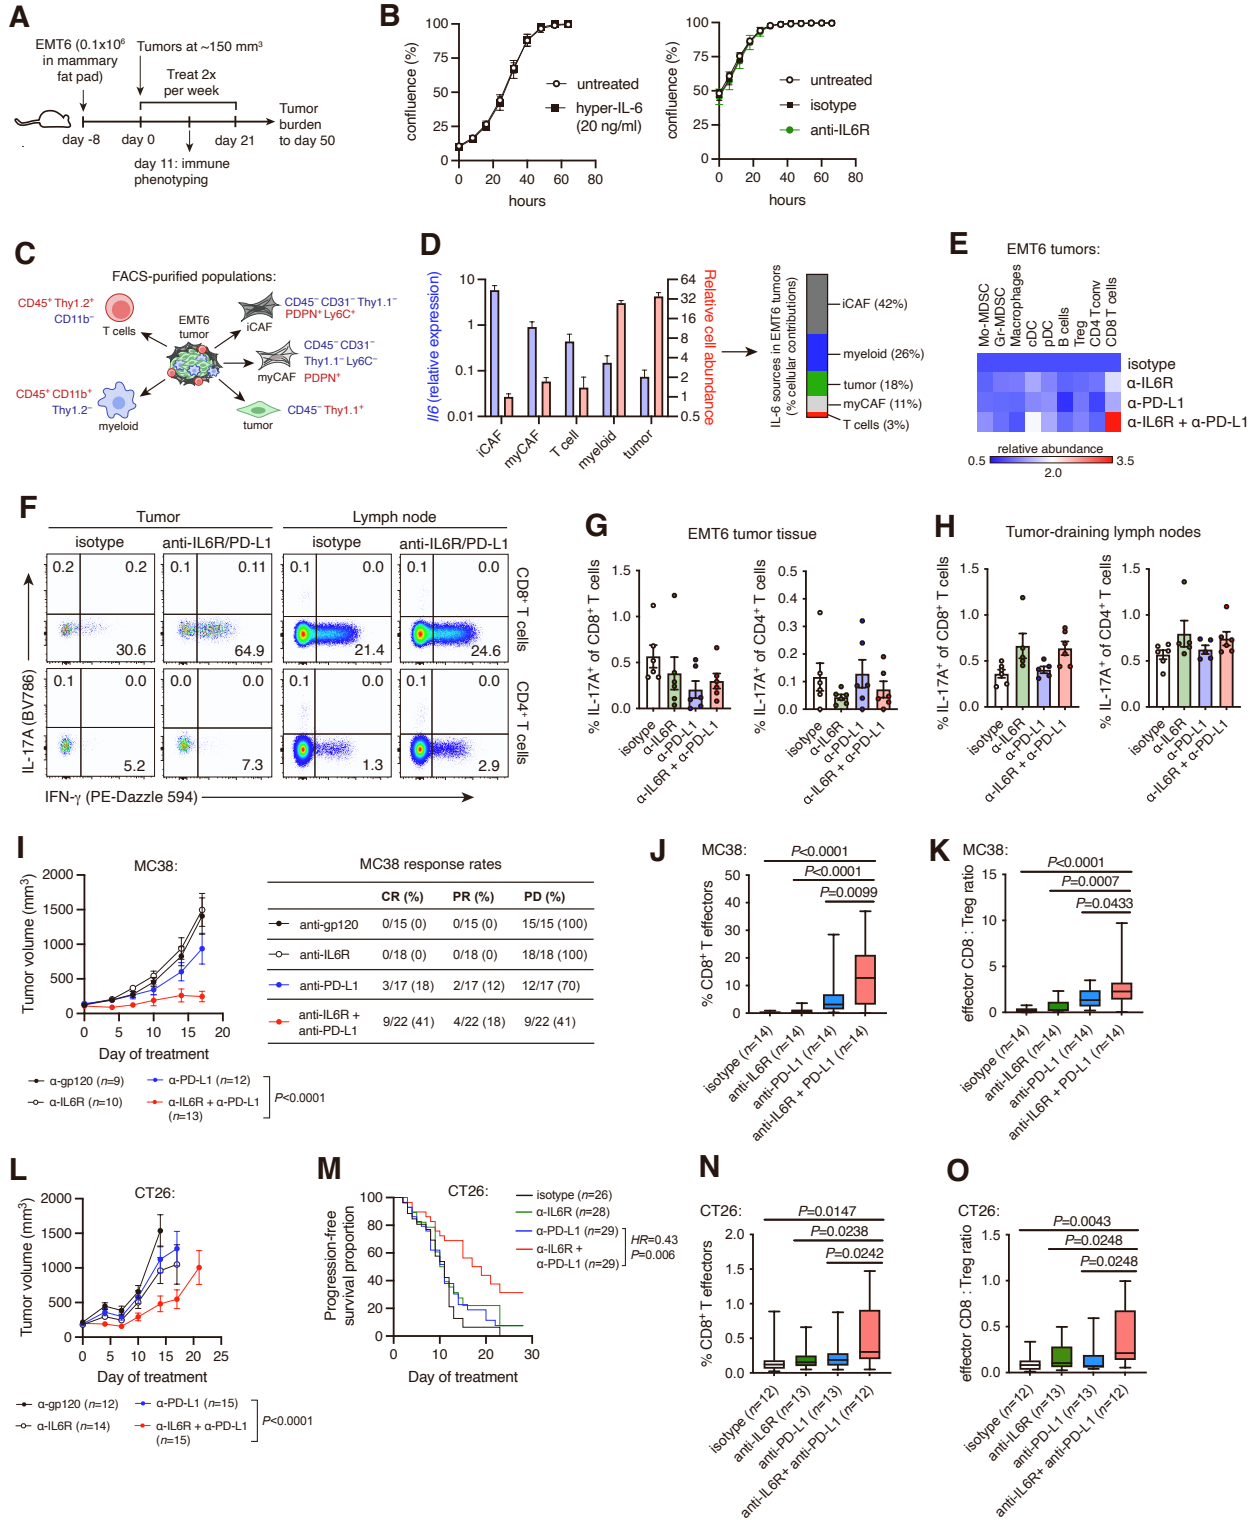

Legend on following page

**Supplementary Figure 2. IL-6 inhibits anti-PD-L1 efficacy and effector differentiation of CD8<sup>+</sup> T cells (related to Figure 2).**

(A) Blockade of IL6R and PD-L1 in the orthotopic EMT6 mammary tumor model. Tumors reached 150 mm<sup>3</sup> before randomization to treatment groups. Mice were treated with anti-IL6R and/or anti-PD-L1 antibodies twice weekly for 3 weeks for long-term tumor control studies, and for 10–11 days for analysis of tumor immune infiltrates.

(B) *In vitro* proliferation of EMT6 cells in the presence of hyper-IL-6 or anti-IL6R antibody, measured by Incucyte confluence assay ( $n=4$  technical replicates  $\pm$  s.e.m. per condition). EMT6 cells do not respond to IL-6 due to lack of IL6R expression, but are sensitive to hyper-IL-6 (a fusion protein of IL-6 and the soluble form of IL6R).

(C) FACS-sorting strategy to isolate major cell populations from EMT6 tumors.

(D) RT-qPCR analysis of *IL6* mRNA expression in cells isolated from untreated EMT6 tumors (from  $n=3$  mice) as indicated in panel C ( $n=3$  biological replicates). Blue bars indicate relative *IL6* expression (normalized to *Hprt*) in each cell type, while salmon bars indicate the relative abundance of each cell population as determined by flow cytometry (with the rarest cell type, iCAFs, set at 1). *IL6* expression and relative cell abundance were combined to estimate the percentage of overall *IL6* expression attributable to each cell type in the tumor, displayed as a stacked bar chart.

(E) Relative abundance of leukocyte populations in EMT6 tumors after treatment. Heatmap indicates mean fold change relative to isotype control, from  $n=16$ – $17$  mice pooled from three studies. Combination treatment caused a significant ( $P=0.0003$ ) increase in CD8<sup>+</sup> T cells relative anti-PD-L1 alone, but no significant changes were observed for other cell types.

(F–H) Analysis of Th17 (IL-17A<sup>+</sup> CD4<sup>+</sup> T cells) and Tc17 (IL-17A<sup>+</sup> CD8<sup>+</sup> T cells) cells in EMT6 tumor tissue and draining lymph nodes ( $n=5$ – $6$  mice per group). Representative flow cytometry plots are shown in panel F. IL-17A<sup>+</sup> cell frequencies are provided for tumor and lymph nodes in panels G and H, respectively. Data are representative of three independent experiments.

(I–K) Anti-PD-L1 and/or anti-IL6R treatment of established (150 mm<sup>3</sup>) subcutaneous MC38 tumors.

(I) MC38 tumor growth after treatment randomization. Anti-PD-L1 and combination treatment groups compared using two-way ANOVA ( $P$ -value reported for treatment effect). Rates of CR (complete tumor regression), PR (tumor regression of >50% followed by re-growth), and PD (persistent growth or regression <50%) are provided in the accompanying table (containing data pooled from two studies).

(J) Frequency of IFN- $\gamma$ <sup>+</sup> CD8<sup>+</sup> T cells among tumor-infiltrating CD45<sup>+</sup> cells isolated from MC38 tumors after 10 days of treatment. Biological replicates are pooled from two studies. Groups compared using one-way ANOVA with Holm-Sidak's multiple comparisons test.

(K) Ratio of IFN- $\gamma$ <sup>+</sup> CD8<sup>+</sup> T cells to Foxp3<sup>+</sup> CD4<sup>+</sup> Treg cells in MC38 tumors after 10 days of treatment. Biological replicates are pooled from two studies. Groups compared using one-way ANOVA with Holm-Sidak's multiple comparisons test.

(L–O) Anti-PD-L1 and/or anti-IL6R treatment of established (150 mm<sup>3</sup>) subcutaneous CT26 tumors.

(L) CT26 tumor growth after treatment randomization ( $n=5$ – $6$  mice per group). Anti-PD-L1 and combination treatment groups compared using two-way ANOVA ( $P$ -value reported for treatment effect). Unlike MC38, complete tumor regression was not observed in this tumor model.

(M) Time-to-progression Kaplan-Meier analysis (5x increase in tumor volume) of CT26 tumors, starting from time of treatment. Anti-PD-L1 and combination groups compared using log-rank test. Biological replicates are pooled from three studies.

(N) Frequency of polyfunctional CD8<sup>+</sup> T cells among tumor-infiltrating CD45<sup>+</sup> cells isolated from CT26 tumors after 10 days of treatment. Data are pooled from two studies. Groups compared using one-way ANOVA with Holm-Sidak's multiple comparisons test.

(O) Ratio of effector CD8<sup>+</sup> T cells to Foxp3<sup>+</sup> CD4<sup>+</sup> Treg cells in CT26 tumors after 10 days of treatment. Data are pooled from two studies. Groups compared using one-way ANOVA with Holm-Sidak's multiple comparisons test.

### Supplementary Figure 3

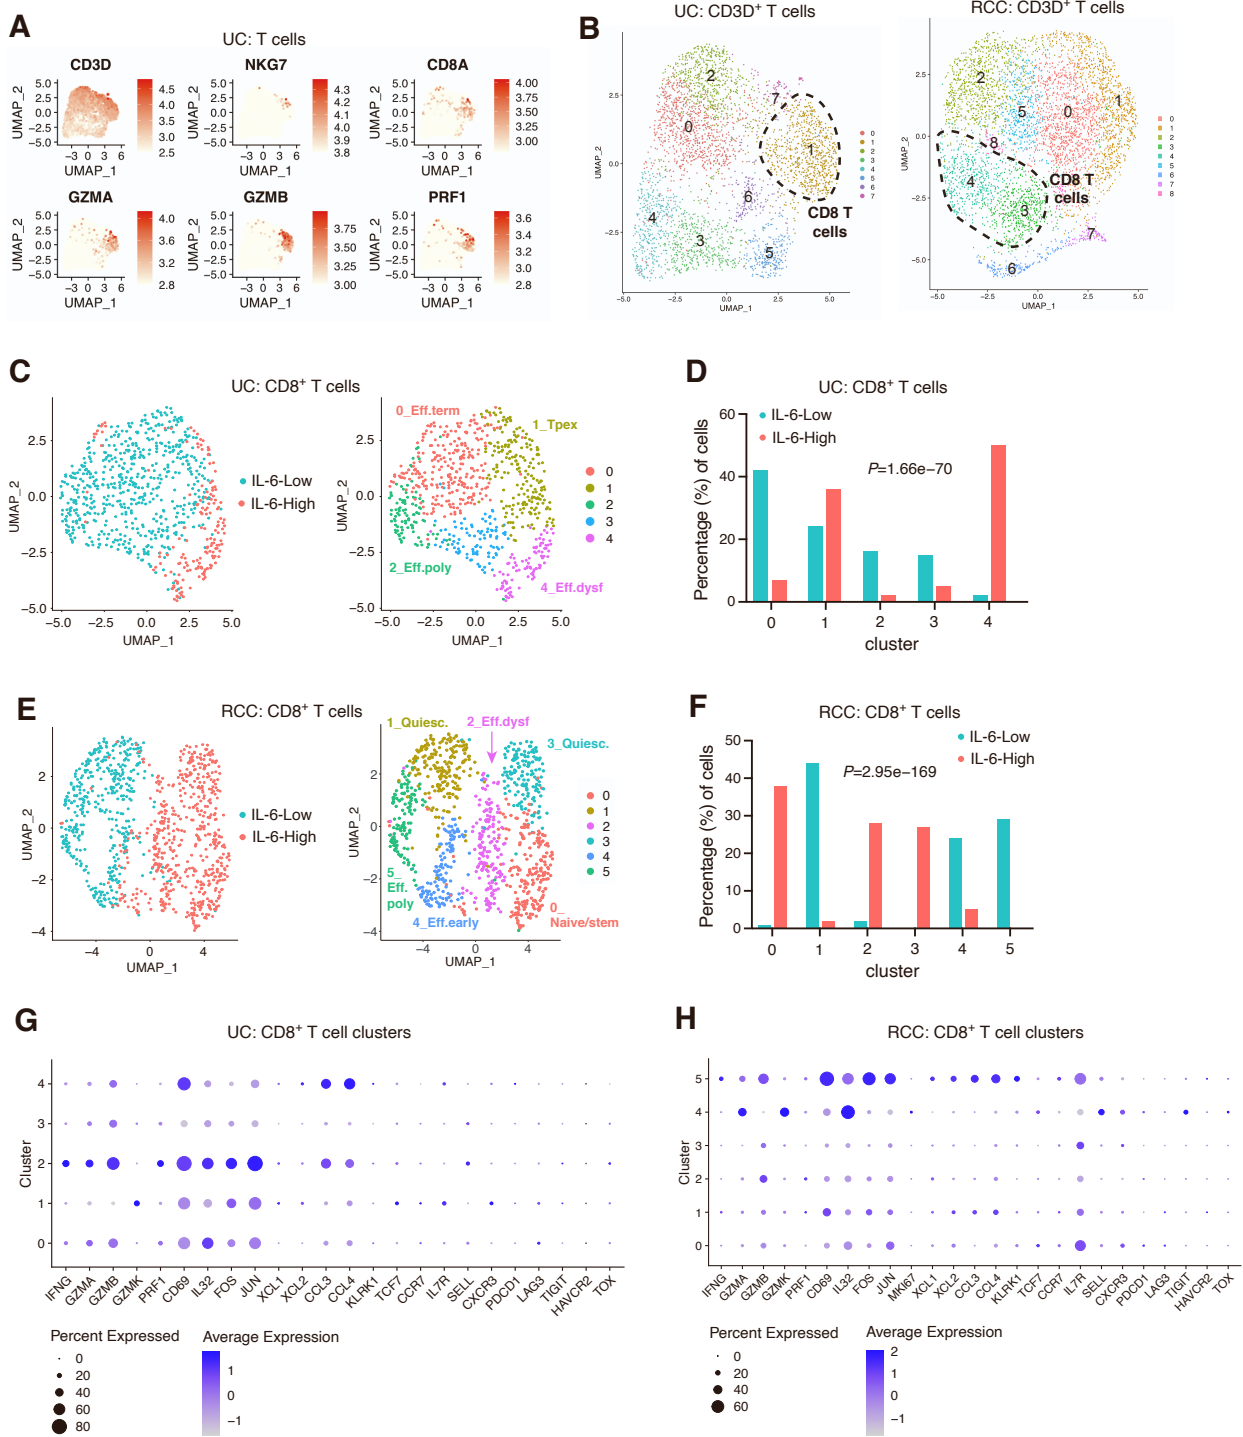

Legend on following page

**Supplementary Figure 3. Single-cell RNA-seq analysis of CD8<sup>+</sup> T cells from patients with high or low plasma IL-6 (related to Figure 2I–K).**

(A, B) For samples from both UC and RCC cohorts, PBMC were clustered using UMAP analysis to identify total T cells (A), which were then sub-clustered to identify CD8<sup>+</sup> T cells (B) based on co-expression of markers such as *CD8A*, *GZMB*, *NKG7*, and *PRF1*.

(C, E) CD8<sup>+</sup> T cells from UC (C) and RCC (E) samples were further UMAP-clustered to identify transcriptionally distinct subpopulations. 5 subclusters were identified for UC-derived samples, and 6 subclusters for RCC-derived samples. Proposed cluster identities are indicated as follows: *Eff.poly*, polyfunctional effectors; *Eff.early*, early differentiated effectors; *Eff.dysf*, dysfunctional effectors; *Naïve/stem*, naïve/central memory/stem-like cells; *Quiesc.*, quiescent with high expression of ribosomal genes and low expression of effector markers; *Tpex*, T progenitor exhausted.

(D, F) Frequency distributions of CD8<sup>+</sup> T cell subclusters among cells derived from UC (D) or RCC (F) patients with high or low plasma IL-6. Cluster distributions were compared using Chi-square analysis.

(G, H) Dot plots representing expression of key genes associated with effector function, naïve/memory-like states, or exhaustion among CD8<sup>+</sup> T cell subclusters from UC (G) and RCC (H) samples. UC cluster 2 and RCC cluster 5 are defined as polyfunctional effector cells based on co-expression of multiple effector markers, including *IFNG* and *GZMB*.

## Supplementary Figure 4

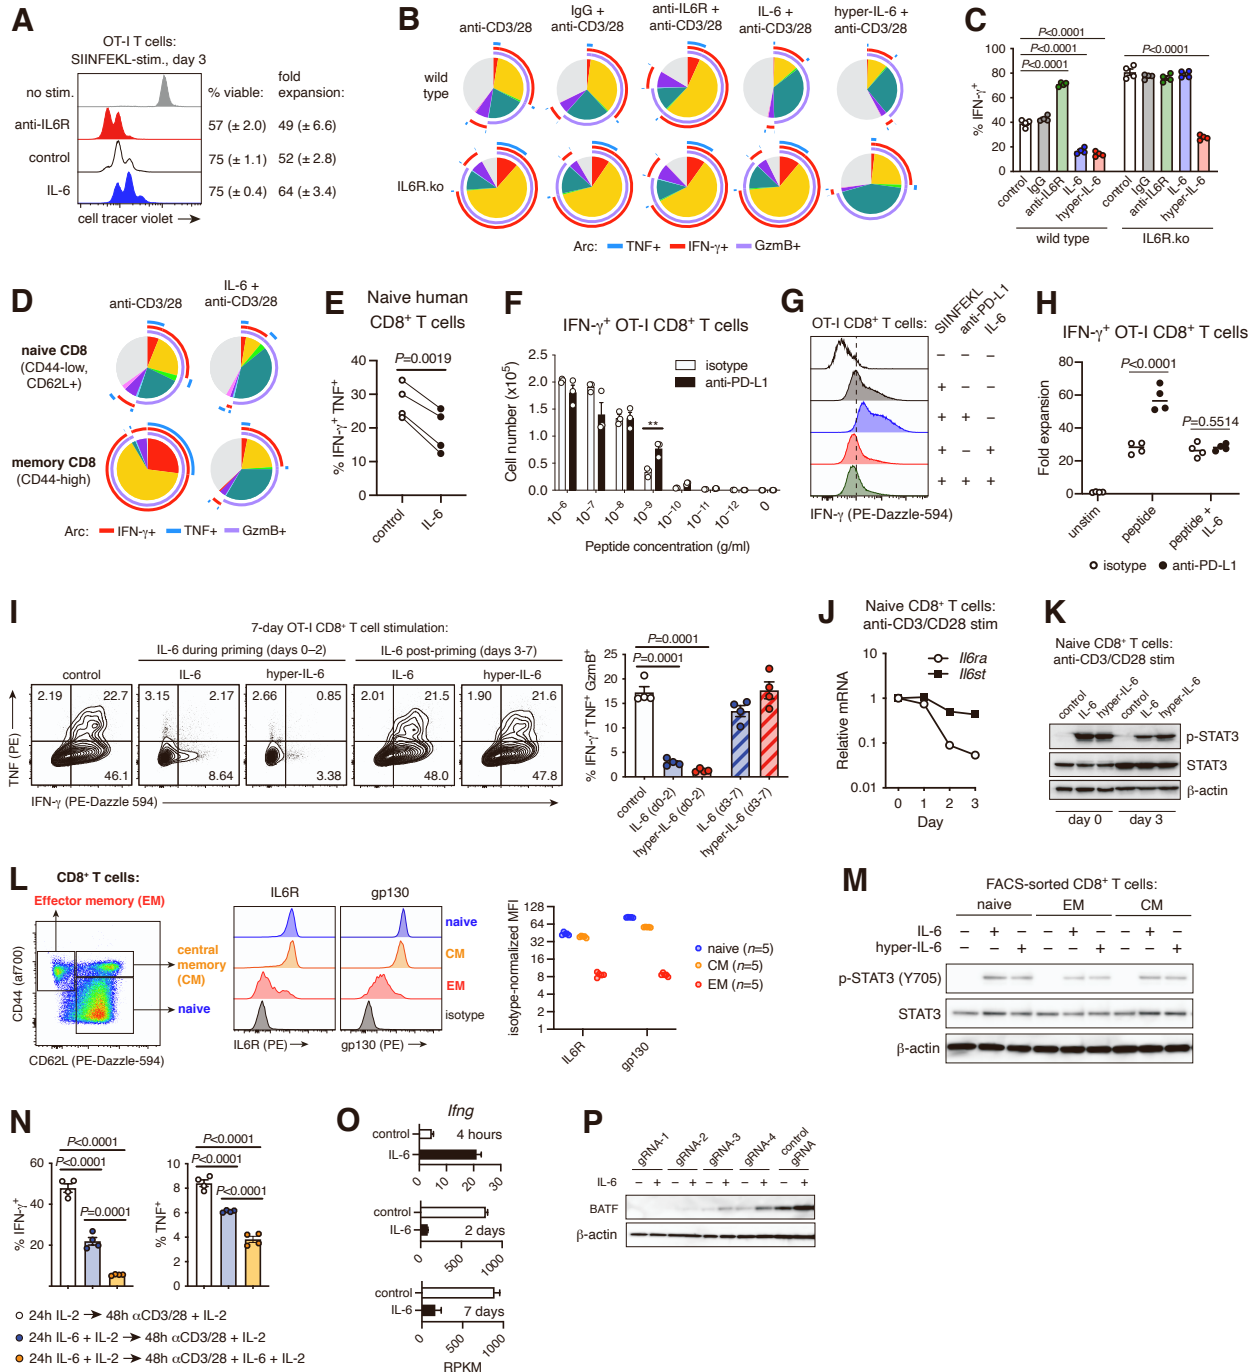

### Supplementary Figure 4. Inhibition of CD8<sup>+</sup> T cell function by IL-6 (related to Figures 3-4).

(A) Proliferation of OT-I CD8<sup>+</sup> T cells following stimulation of bulk splenocytes with SIINFPEKL peptide and IL-6 or anti-IL6R antibody. Mean % viable cells and fold expansion values ( $\pm$  s.e.m.) are provided for day 3, based on  $n=4$  technical replicates per group. Data are representative of three experiments.



**(B)** Boolean analysis (represented as SPICE plots) of IFN- $\gamma$ , TNF, and GzmB expression in polyclonally activated CD8<sup>+</sup> T cells. Splenocytes from IL6R.ko mice or WT littermates were cultured with plate-bound anti-CD3/CD28 antibodies in the presence of isotype control antibody, anti-IL6R antibody, IL-6, or hyper-IL-6. CD8<sup>+</sup> T cells were analyzed after 3 days. Data represent 3 independent experiments. Colored arcs represent the proportion of cells expressing the indicated factor. Overlapping arcs indicate factor co-expression. Pie segments are colored uniquely to highlight different co-expression phenotypes (e.g. red = IFN- $\gamma$ <sup>+</sup> GzmB<sup>+</sup> TNF<sup>+</sup>; yellow = IFN- $\gamma$ <sup>+</sup> GzmB<sup>+</sup> TNF<sup>-</sup>; gray = IFN- $\gamma$ <sup>-</sup> GzmB<sup>-</sup> TNF<sup>-</sup>, etc).

**(C)** IFN- $\gamma$ <sup>+</sup> frequencies among CD8<sup>+</sup> T cells from panel **B**. Groups compared using one-way ANOVA with Tukey's multiple comparisons test.

**(D)** Boolean analysis of IFN- $\gamma$ , TNF, and GzmB expression in FACS-sorted naïve or memory CD8<sup>+</sup> T cells from WT C57BL/6J mice, activated for 3 days with anti-CD3/CD28 antibodies +/- IL-6. Data are representative of two independent experiments.

**(E)** Activation of human naïve CD8<sup>+</sup> T cells isolated from PBMC of  $n=4$  healthy donors. T cells were activated with plate-bound anti-CD3 and soluble anti-CD28 antibody, with or without 10 ng/ml recombinant human IL-6. Cells were restimulated on day 5 with PMA/ionomycin and analyzed by flow cytometry for expression of IFN- $\gamma$  and TNF. Groups compared using paired *t*-test.

**(F–H)** Inhibition of anti-PD-L1 effects by IL-6 in an *ex vivo* OT-I T cell activation assay based on peptide-stimulation of bulk splenocytes. CD8<sup>+</sup> T cell expansion and phenotype was assessed by flow cytometry. Data points represent technical replicates.

**(F)** SIINFEKL peptide was titrated in 10-fold dilutions to optimize detection of anti-PD-L1-driven enhancement of CD8<sup>+</sup> T cell activation. Groups compared by *t*-test; \*\* $P<0.01$ .

**(G)** Flow cytometry analysis of IFN- $\gamma$  expression after activation with 1 ng/ml SIINFEKL in the presence of isotype control antibody, anti-PD-L1 antibody, IL-6, or combined anti-PD-L1 and IL-6.

**(H)** Relative expansion of IFN- $\gamma$ <sup>+</sup> OT-I CD8<sup>+</sup> T cells activated as described in panel **G**. Groups compared by *t*-test; data represent two independent experiments.

**(I)** OT-I splenocytes were cultured with SIINFEKL peptide in the presence or absence of IL-6 or hyper-IL-6 for 2 days, at which time IL-6 was removed and cells were maintained in medium supplemented with IL-2 for 4 days. Cells were restimulated with anti-CD3/CD28 for 1 day and CD8<sup>+</sup> T cells were analyzed by flow cytometry on day 7. Alternatively, cells were activated for the first 2 days with peptide only, and IL-6 or hyper-IL-6 was added from days 3-7. Representative contour plots of IFN- $\gamma$  and TNF expression are shown, in addition to summarized frequencies of polyfunctional cells among CD8<sup>+</sup> T cells. Groups compared using one-way ANOVA with Holm-Sidak's multiple comparisons test. Data are representative of two experiments.

**(J)** Naïve CD8<sup>+</sup> T cells from WT C57BL/6J mice were activated with anti-CD3/CD28 antibodies and cells were collected daily for analysis of *Il6ra* and *Il6st* (gp130) expression by qRT-PCR (normalized to *Rpl19*). Data points indicate mean ( $\pm$  s.e.m.) of technical triplicates.

**(K)** Naïve CD8<sup>+</sup> T cells from WT C57BL/6J mice were stimulated with IL-6 or hyper-IL-6 for 15 minutes, either at resting state or after 3 days of anti-CD3/CD28 stimulation, and cells were harvested for analysis of STAT3 phosphorylation (Y705) by western blot.

**(L)** Flow cytometry analysis of IL6R and gp130 expression on naïve, CM, and EM CD8<sup>+</sup> T cells from healthy C57BL/6J mice. Representative histograms are shown in the center panel, and quantification of protein expression (relative to isotype control) in the right panel. Data points indicate biological replicates.

**(M)** Naïve, CM, or EM CD8<sup>+</sup> T cells from WT C57BL/6J mice were isolated by FACS, rested in culture for 1 hour without TCR or cytokine stimulation, and then treated with IL-6 or hyper-IL-6 for 15 minutes. Cells were lysed and analyzed for STAT3 phosphorylation (Y705) by western blot.

**(N)** WT CD8<sup>+</sup> T cells (C57BL/6J) were activated in one of the following 3 ways: standard anti-CD3/CD28 stimulation after culture with IL-2 for 1 day; culture with IL-6 + IL-2 for 1 day prior to anti-CD3/CD28 stimulation, at which time IL-6 was withdrawn; or culture with IL-6 + IL-2 for 1 day prior to anti-CD3/CD28, with continuous IL-6 stimulation for the duration of the experiment. IFN- $\gamma$  and TNF expression was assessed by flow cytometry on

day 3 following anti-CD3/CD28 stimulation. Groups of  $n=4$  technical replicates were compared using one-way ANOVA with Tukey's multiple comparisons test; data represent two independent experiments.

**(O)** *Ifng* mRNA expression in CD8<sup>+</sup> T cells with or without IL-6 stimulation at 4h, 2d, or 7d following TCR stimulation. Bars indicate mean ( $\pm$  s.e.m.) of  $n=3$  technical replicates. *Associated with Fig. 4A.*

**(P)** Generation of BATF CRISPR-ko cells from primary CD8<sup>+</sup> T cells using electroporation of Cas9-gRNA complexes. Cells were electroporated two days prior to anti-CD3/CD28 stimulation and maintained in medium containing 5 ng/ml recombinant IL-7. BATF deletion was assessed by western blot 2 days after anti-CD3/CD28 stimulation +/- IL-6. Out of 4 BATF-targeting gRNA sequences tested, gRNA-1 was selected for downstream functional studies. *Associated with Fig. 4G.*

## Supplementary Figure 5

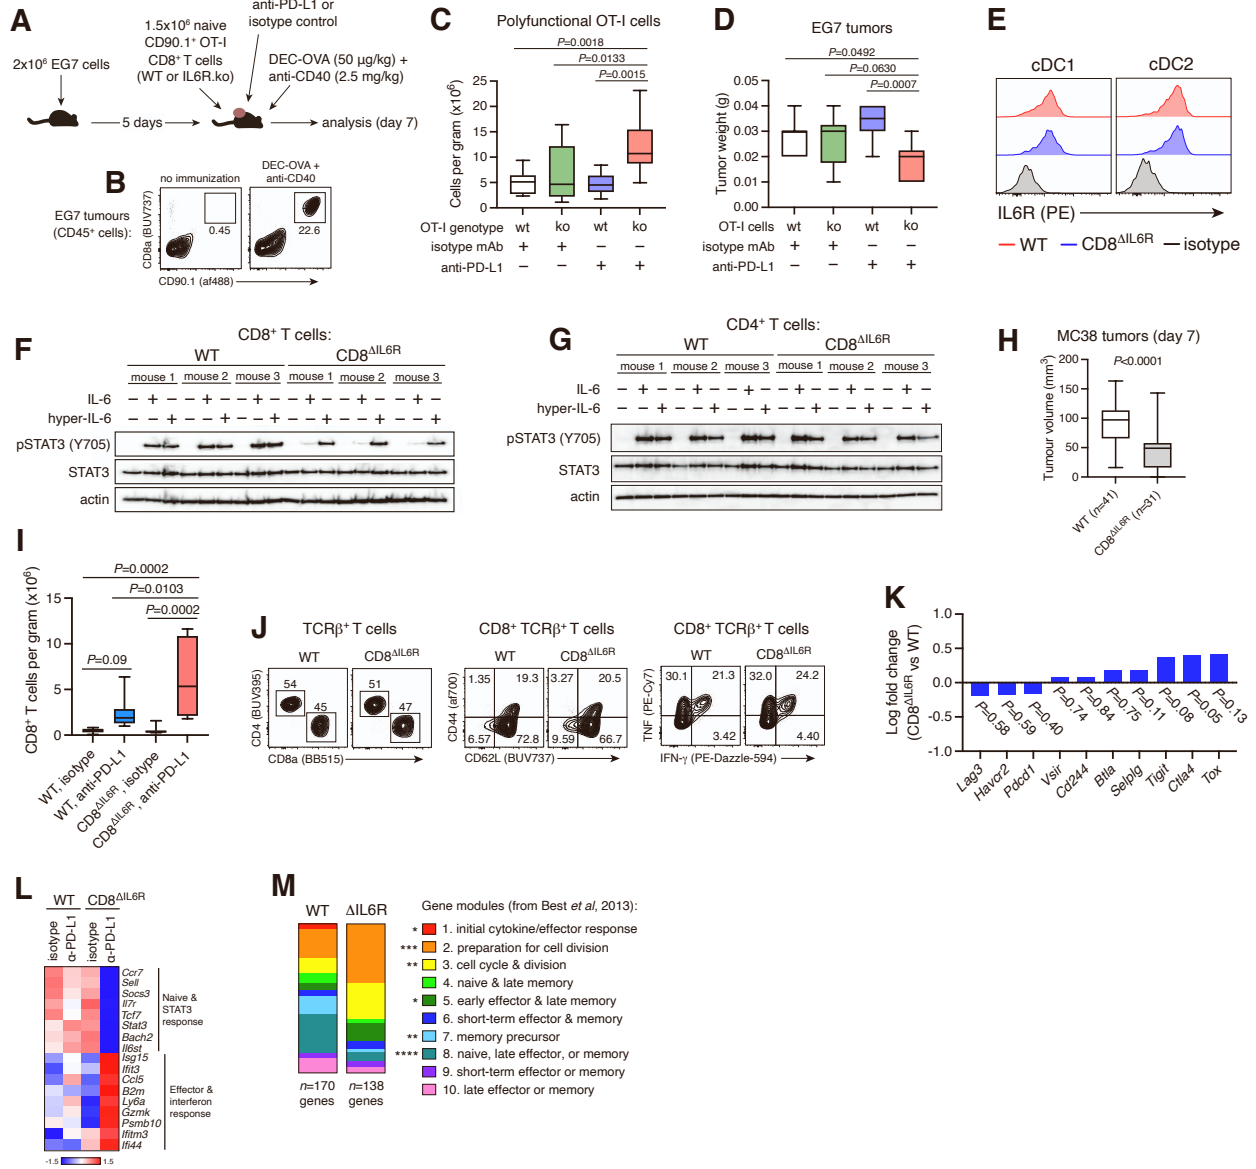

### Supplementary Figure 5. Suppression of anti-PD-L1 response *via* CD8<sup>+</sup> T cell-intrinsic IL-6 signaling (related to Figure 5).

(A) Adoptive transfer and *in vivo* activation of WT or IL6R.ko OT-I CD8<sup>+</sup> T cells in mice bearing established EG7 tumors. All treatments were initiated on the same day. Isotype/anti-PD-L1 treatments were administered again 4 days later.

(B) Impact of DEC-OVA (ovalbumin fused to anti-DEC205 antibody) + anti-CD40 immunization on activation of CD90.1 (Thy1.1)<sup>+</sup> OT-I cells in EG7 tumor-bearing mice. OT-I cells are primed ineffectively toward EG7 tumors in the absence of additional immunization with ovalbumin. Cells are gated on total tumor-infiltrating CD45<sup>+</sup> cells.

(C, D) Abundance of polyfunctional (IFN- $\gamma$ <sup>+</sup> GzmB<sup>+</sup> TNF<sup>+</sup>) OT-I CD8<sup>+</sup> T cells normalized to tumor weight (C), and tumor masses (D) after one week of treatment. Data are from  $n=9-10$  mice per group, compared using one-way ANOVA with Holm-Sidak's multiple comparisons test. Data are representative of three experiments.

(E) IL6R expression on lymph node-derived cDC1 (CD11b<sup>-</sup> CD8a<sup>+</sup> CD11c<sup>+</sup> MHC-II<sup>+</sup>) and cDC2 (CD11b<sup>+</sup> CD8a<sup>-</sup> CD11c<sup>+</sup> MHC-II<sup>+</sup>) from CD8 <sup>$\Delta$ IL6R</sup> mice or WT littermates.

(F, G) Western blot analysis of STAT3 activation in splenic CD8<sup>+</sup> T cells (F) or CD4<sup>+</sup> T cells (G) from healthy CD8 <sup>$\Delta$ IL6R</sup> mice or WT littermates. Cells were stimulated *ex vivo* for 20 minutes with 10 ng/ml IL-6 or 20 ng/ml hyper-IL-6.

(H) MC38 tumor volumes after one week of growth in untreated CD8 <sup>$\Delta$ IL6R</sup> mice or WT littermate controls. Groups compared by Mann-Whitney *U*-test.

(I) Total CD8<sup>+</sup> T cell abundance (normalized to tumor weight) in MC38 tumors of CD8 <sup>$\Delta$ IL6R</sup> mice or WT littermates after one week of anti-PD-L1 or isotype control treatment. Data are from  $n=6-9$  mice per group from one of two independent experiments; groups compared using one-way ANOVA with Holm-Sidak's multiple comparisons tests.

(J) Lymph node-derived CD8<sup>+</sup> T cell frequency and phenotype in CD8 <sup>$\Delta$ IL6R</sup> mice versus WT littermates. For cytokine analysis, cells were restimulated *ex vivo* with PMA/ionomycin for 2 hours. Plots are representative of 3 healthy female mice per genotype.

(K) RNAseq analysis of exhaustion-related markers in CD8<sup>+</sup> T cells sorted from MC38 tumors in CD8 <sup>$\Delta$ IL6R</sup> mice or WT littermates treated with anti-PD-L1.

(L) Expression of selected genes associated with naïve T cells, STAT3 response, and IFN response in CD8<sup>+</sup> T cells sorted from MC38 tumors in CD8 <sup>$\Delta$ IL6R</sup> mice or WT littermates treated with anti-PD-L1 or isotype control antibodies.

(M) Distribution of differentially expressed genes from RNAseq analysis of tumor-infiltrating CD8<sup>+</sup> T cells from anti-PD-L1-treated CD8 <sup>$\Delta$ IL6R</sup> mice or WT littermates among CD8<sup>+</sup> T cell differentiation modules 1–10 from Best *et al* (*Nat Immunol*, 2013; OT-I cells activated *in vivo* by infection with *Listeria*-OVA). \* $P<0.05$ ,  $>0.01$ ; \*\* $P<0.01$ ,  $>0.001$ ; \*\*\* $P<0.001$ ,  $>0.0001$ ; \*\*\*\* $P<0.0001$  (Fisher's exact test).

| Variable                   | IMmotion150 - Atezo |               |                |         | IMmotion150 - Atezo+Bev |               |                |         | IMmotion150 - Sunitinib |               |                |         |
|----------------------------|---------------------|---------------|----------------|---------|-------------------------|---------------|----------------|---------|-------------------------|---------------|----------------|---------|
|                            | Total N (%)         | IL6 low N (%) | IL6 High N (%) | P value | Total N (%)             | IL6 low N (%) | IL6 High N (%) | P value | Total N (%)             | IL6 low N (%) | IL6 High N (%) | P value |
| <b>Age</b>                 |                     |               |                |         |                         |               |                |         |                         |               |                |         |
| All patients               | 84                  | 57            | 27             | NA      | 82                      | 54            | 28             | NA      | 80                      | 49            | 31             | NA      |
| median age (years) (range) | 62 (26-81)          | 63 (37-81)    | 61 (26-79)     | NA      | 61 (35-87)              | 61 (35-87)    | 60 (48-74)     | NA      | 62 (25-85)              | 61 (25-85)    | 62 (39-78)     | NA      |
| <b>Sex</b>                 |                     |               |                |         |                         |               |                |         |                         |               |                |         |
| Male                       | 63 (75)             | 43 (75)       | 20 (74)        | 1       | 61 (74)                 | 36 (67)       | 25 (89)        | 0.033   | 65 (81)                 | 40 (82)       | 25 (81)        | 1       |
| Female                     | 21 (25)             | 14 (25)       | 7 (26)         |         | 21 (26)                 | 18 (33)       | 3 (11)         |         | 15 (19)                 | 9 (18)        | 6 (19)         |         |
| <b>Race</b>                |                     |               |                |         |                         |               |                |         |                         |               |                |         |
| White                      | 75 (89)             | 49 (86)       | 26 (97)        | 0.26    | 72 (88)                 | 48 (89)       | 24 (85)        | 0.728   | 73 (92)                 | 43 (88)       | 30 (97)        | 0.239   |
| Black                      | 3 (4)               | 3 (5)         | 0 (0)          |         | 2 (2)                   | 1 (2)         | 1 (4)          |         | 1 (1)                   | 1 (2)         | 0 (0)          |         |
| Asian                      | 1 (1)               | 0 (0)         | 1 (3)          |         | 2 (2)                   | 1 (2)         | 1 (4)          |         | 1 (1)                   | 1 (2)         | 0 (0)          |         |
| Other                      | 5 (6)               | 5 (9)         | 0 (0)          |         | 6 (7)                   | 4 (7)         | 2 (7)          |         | 5 (6)                   | 4 (8)         | 1 (3)          |         |
| <b>Liver Mets</b>          |                     |               |                |         |                         |               |                |         |                         |               |                |         |
| Yes                        | 23 (27)             | 17 (30)       | 6 (22)         | 0.625   | 23 (28)                 | 9 (17)        | 14 (50)        | 0.004   | 16 (20)                 | 10 (21)       | 6 (19)         | 1       |
| No                         | 61 (73)             | 40 (70)       | 21 (78)        |         | 59 (72)                 | 45 (83)       | 14 (50)        |         | 64 (80)                 | 39 (79)       | 25 (81)        |         |
| <b>PNEPH</b>               |                     |               |                |         |                         |               |                |         |                         |               |                |         |
| Yes                        | 75 (89)             | 54 (95)       | 21 (78)        | 0.027   | 72 (88)                 | 50 (93)       | 22 (79)        | 0.083   | 69 (86)                 | 45 (92)       | 24 (77)        | 0.1     |
| No                         | 9 (21)              | 3 (5)         | 6 (22)         |         | 10 (12)                 | 4 (7)         | 6 (21)         |         | 11 (14)                 | 4 (8)         | 7 (23)         |         |
| <b>MSKCC</b>               |                     |               |                |         |                         |               |                |         |                         |               |                |         |
| Favorable                  | 21 (25)             | 18 (32)       | 3 (11)         | 0.05    | 21 (26)                 | 18 (33)       | 3 (11)         | 0.005   | 12 (15)                 | 8 (16)        | 4 (13)         | 0.758   |
| Intermediate               | 57 (68)             | 38 (67)       | 18 (67)        |         | 53 (64)                 | 36 (67)       | 17 (61)        |         | 59 (73)                 | 38 (78)       | 21 (68)        |         |
| Poor                       | 6 (7)               | 1 (1)         | 6 (22)         |         | 8 (10)                  | 0 (0)         | 8 (28)         |         | 9 (11)                  | 3 (6)         | 6 (19)         |         |
| <b>SLD</b>                 |                     |               |                |         |                         |               |                |         |                         |               |                |         |
| median (mm) (range)        | 55 (12-265)         | 49 (12-265)   | 93 (22-254)    | 0.043   | 73 (17-295)             | 67 (17-295)   | 91 (21-278)    | 0.031   | 57 (10-288)             | 52 (10-208)   | 86 (21-288)    | 0.042   |

**Supplementary Table 1 (related to Figure 1).** Demographic characteristics of RCC (renal cell carcinoma) patients in the IMmotion150 study. IL-6 status refers to plasma IL-6 (high, >10 pg/ml).

| Variable                   | IMvigor210  |               |                |          | IMvigor211-Atezo           |               |                |             | IMvigor211-Chemo |               |                |             |          |
|----------------------------|-------------|---------------|----------------|----------|----------------------------|---------------|----------------|-------------|------------------|---------------|----------------|-------------|----------|
|                            | Total N (%) | IL6 low N (%) | IL6 High N (%) | P value  | Total N (%)                | IL6 low N (%) | IL6 High N (%) | P value     | Total N (%)      | IL6 low N (%) | IL6 High N (%) | P value     |          |
| <b>Age</b>                 |             |               |                |          |                            |               |                |             |                  |               |                |             |          |
| All patients               | 332         | 141           | 191            | NA       | All patients               | 441           | 216            | 225         | NA               | 410           | 213            | 197         | NA       |
| median age (years) (range) | 68 (32-91)  | 68 (42-89)    | 68 (32-91)     | NA       | median age (years) (range) | 67 (33-88)    | 67 (33-88)     | 67 (39-88)  | NA               | 67 (31-84)    | 68 (31-82)     | 67 (36-84)  | NA       |
| <b>Sex</b>                 |             |               |                |          |                            |               |                |             |                  |               |                |             |          |
| Male                       | 263 (80)    | 108 (77)      | 155 (81)       | 0.34     | Male                       | 336 (76)      | 157 (73)       | 179 (80)    | 0.09             | 321 (78)      | 164 (77)       | 157 (80)    | 0.55     |
| Female                     | 69 (20)     | 33 (23)       | 36 (19)        |          | 105 (24)                   | 59 (27)       | 46 (20)        | 89 (22)     |                  | 49 (23)       | 40 (20)        |             |          |
| <b>Race</b>                |             |               |                |          |                            |               |                |             |                  |               |                |             |          |
| White                      | 302 (91)    | 125 (89)      | 177 (93)       | 0.246    | White                      | 315 (71)      | 148 (68)       | 167 (74)    | 0.169            | 291 (71)      | 151 (70)       | 140 (72)    | 0.741    |
| Black                      | 9 (3)       | 5 (4)         | 4 (2)          |          | 1 (1)                      | 0 (0)         | 1 (1)          | 2 (1)       |                  | 0 (0)         | 2 (1)          |             |          |
| Asian                      | 8 (2)       | 4 (3)         | 4 (2)          |          | 62 (13)                    | 31 (15)       | 31 (14)        | 51 (12)     |                  | 24 (12)       | 27 (13)        |             |          |
| Other                      | 13 (4)      | 7 (4)         | 6 (3)          |          | 63 (14)                    | 37 (17)       | 26 (11)        | 66 (16)     |                  | 38 (18)       | 28 (14)        |             |          |
| <b>Liver Mets</b>          |             |               |                |          |                            |               |                |             |                  |               |                |             |          |
| Yes                        | 93 (28)     | 32 (23)       | 61 (32)        | 0.065    | Yes                        | 128 (29)      | 55 (25)        | 73 (32)     | 0.116            | 107 (26)      | 34 (16)        | 73 (37)     | 1.16E-06 |
| No                         | 239 (72)    | 109 (73)      | 130 (68)       |          | 313 (71)                   | 161 (75)      | 152 (68)       | 303 (74)    |                  | 179 (84)      | 124 (63)       |             |          |
| <b>TMB</b>                 |             |               |                |          |                            |               |                |             |                  |               |                |             |          |
| <10                        | 152 (59)    | 66 (59)       | 86 (58)        | 0.899    | <10                        | 120 (55)      | 74 (59)        | 66 (59)     | 1                | 120 (53)      | 59 (50)        | 61 (51)     | 0.429    |
| >=10                       | 107 (41)    | 45 (41)       | 62 (42)        |          | 98 (45)                    | 52 (41)       | 46 (41)        | 108 (47)    |                  | 59 (50)       | 49 (49)        |             |          |
| <b>ECOG</b>                |             |               |                |          |                            |               |                |             |                  |               |                |             |          |
| 0                          | 127 (38)    | 78 (55)       | 49 (26)        | 2.63E-11 | 0                          | 208 (47)      | 132 (61)       | 76 (34)     | 5.63E-09         | 183 (45)      | 115 (54)       | 68 (35)     | 1.01E-04 |
| 1 or 2                     | 205 (62)    | 63 (45)       | 142 (74)       |          | 235 (53)                   | 84 (39)       | 151 (66)       | 227 (55)    |                  | 98 (46)       | 129 (65)       |             |          |
| <b>SLD</b>                 |             |               |                |          |                            |               |                |             |                  |               |                |             |          |
| median (mm) (range)        | 55 (10-309) | 36 (10-54)    | 80 (55-309)    | 0.012    | median (mm) (range)        | 160 (1-281)   | 161 (1-281)    | 160 (5-278) | 0.03             | 167 (3-280)   | 169 (3-280)    | 160 (5-280) | 0.041    |

**Supplementary Table 2 (related to Figure 1).** Demographic characteristics of UC (urothelial bladder cancer) patients in the IMvigor210 and IMvigor211 studies. IL-6 status refers to plasma IL-6 (high, >10 pg/ml).



| <b>PCD4989g - TNBC</b>        |                    |                      |                       |                |
|-------------------------------|--------------------|----------------------|-----------------------|----------------|
| <b>Variable</b>               | <b>Total N (%)</b> | <b>IL6 low N (%)</b> | <b>IL6 High N (%)</b> | <b>P value</b> |
| <b>Age</b>                    |                    |                      |                       |                |
| All patients                  | 115                | 71                   | 44                    | NA             |
| median age (years)<br>(range) | 52 (29-79)         | 52 (29-79)           | 53 (33-76)            | NA             |
| <b>Sex</b>                    |                    |                      |                       |                |
| Male                          | 0                  | 0                    | 0                     | 1              |
| Female                        | 115 (100)          | 71 (100)             | 44 (100)              |                |
| <b>Race</b>                   |                    |                      |                       |                |
| White                         | 88 (77)            | 58 (82)              | 30 (68)               | 0.116          |
| Black                         | 7 (6)              | 3 (4)                | 4 (9)                 |                |
| Asian                         | 6 (5)              | 2 (3)                | 4 (9)                 |                |
| Other                         | 14 (12)            | 8 (11)               | 6 (14)                |                |
| <b>Liver Mets</b>             |                    |                      |                       |                |
| Yes                           | 30 (26)            | 12 (17)              | 18 (41)               | 0.008          |
| No                            | 85 (74)            | 59 (83)              | 26 (59)               |                |
| <b>ECOG</b>                   |                    |                      |                       |                |
| 0                             | 52 (45)            | 41 (58)              | 11 (25)               | <0.001         |
| 1 or 2                        | 63 (55)            | 30 (42)              | 33 (75)               |                |
| <b>SLD</b>                    |                    |                      |                       |                |
| median (mm) (range)           | 5 (1-31)           | 4 (1-19)             | 9 (1-31)              | 0.013          |

**Supplementary Table 3 (related to Figure 1).** Demographic characteristics of TNBC (triple-negative breast cancer) patients in the PCD4989g study. IL-6 status refers to plasma IL-6 (high, >10 pg/ml).
